# 1 **Frataxin Deficiency Drives a Shift from Mitochondrial Metabolism to Glucose Catabolism,** 2 **Triggering an Inflammatory Phenotype in Microglia**

3 Francesca Sciarretta<sup>1</sup>, Fabio Zaccaria<sup>1,2</sup>, Andrea Ninni<sup>1,2</sup>, Veronica Ceci<sup>1,2</sup>, Riccardo Turchi<sup>1</sup>,  
4 Savina Apolloni<sup>1</sup>, Martina Milani<sup>1,3</sup>, Ilaria Della Valle<sup>1,3</sup>, Marta Tiberi<sup>4</sup>, Valerio Chiurchi<sup>4,5</sup>, Nadia  
5 D'Ambrosi<sup>1</sup>, Silvia Pedretti<sup>6</sup>, Nico Mitro<sup>6,7</sup>, Katia Aquilano<sup>1,9\*</sup>, Daniele Lettieri-Barbato<sup>1,8,9\*</sup>

6  
7 1 Department Biology, University of Rome Tor Vergata, Rome, Italy

8 2 PhD Program in Evolutionary Biology and Ecology, University of Rome Tor Vergata, Rome, Italy

9 3 PhD Program in Cellular and Molecular Biology, University of Rome Tor Vergata, Rome, Italy

10 4 Laboratory of Resolution of Neuroinflammation, IRCCS Santa Lucia Foundation, Rome, Italy

11 5 Institute of Translational Pharmacology, IFT-CNR, Rome, Italy

12 6 DiSFeB, Dipartimento di Scienze Farmacologiche e Biomolecolari "Rodolfo Paoletti", Università  
13 degli Studi di Milano, Italy

14 7 Department of Experimental Oncology, IEO, European Institute of Oncology IRCCS, Milan, Italy

15 8 IRCCS Santa Lucia Foundation, Rome, Italy

16 9 Shared co-last authorship

17  
18 \*Correspondence:

19 [daniele.lettieri.barbato@uniroma2.it](mailto:daniele.lettieri.barbato@uniroma2.it);

20 [katia.aquilano@uniroma2.it](mailto:katia.aquilano@uniroma2.it)

## 21 22 23 **ABSTRACT**

24 Immunometabolism investigates the complex interplay between the immune system and cellular  
25 metabolism. This study highlights the effects of mitochondrial frataxin (FXN) depletion, which  
26 causes Friedreich's ataxia (FRDA), a neurodegenerative condition characterized by coordination and  
27 muscle control deficiencies. Using single-cell RNA sequencing, we identified specific cell groups in  
28 the cerebellum of a FRDA mouse model, emphasizing a notable inflammatory microglial response.  
29 These FXN-deficient microglia cells exhibited enhanced inflammatory reactions. Furthermore, our  
30 metabolomic analyses revealed increased glycolysis and itaconate production in these cells, possibly  
31 driving the inflammation. Remarkably, butyrate treatment counteracted these immunometabolic  
32 changes, triggered an antioxidant response via the itaconate-Nrf2-GSH pathways, and dampened  
33 inflammation. The study also pinpointed Hcar2 (GPR109A) as a potential agent for butyrate anti-  
34 inflammatory impact on microglia. Tests on FRDA mice highlighted the neuroprotective attributes  
35 of butyrate intake, bolstering neuromotor performance. In essence, our findings shed light on how  
36 cerebellar microglia activation contributes to FRDA and highlight butyrate potential to alleviate  
37 neuroinflammation, rectify metabolic imbalances, and boost neuromotor capabilities in FRDA and  
38 similar conditions.

## 39 40 **INTRODUCTION**

41 Mutations in the frataxin (FXN) gene plays a critical role in the development of Friedreich's ataxia  
42 (FRDA), a neurodegenerative disorder characterized by progressive muscle weakness and impaired  
43 coordination (Clark et al., 2018). In recent times, the significance of neuroinflammation in the context  
44 of neurodegenerative disorders has gained substantial recognition and emerging findings highlight a

45 potential involvement of FXN loss in neuroinflammation (Apolloni et al., 2022). FXN deficiency has  
46 been shown to increase the production of pro-inflammatory cytokines, suggesting that FXN might be  
47 involved in regulating microglial activity (Hayashi et al., 2014; Khan et al., 2022; Shen et al., 2016).  
48 FXN is a mitochondrial protein, playing an essential role in the intricate process of iron-sulfur cluster  
49 assembly regulating mitochondrial electron transport chain (ETC) and aconitase activity. Loss of  
50 FXN has been suggested to disrupt mitochondrial oxidative capacity and cause mitochondrial ROS  
51 production (Al-Mahdawi et al., 2006; Anzovino et al., 2014). Aberrant mitochondrial metabolism and  
52 increased glycolytic flux are metabolic hallmarks of inflammatory macrophage/microglia activation  
53 (Jha et al., 2015; Sangineto et al., 2023). Although it is now well established that FXN takes center  
54 place in mitochondrial metabolism, the consequence of FXN loss in microglia cells has never been  
55 explored. Several authors demonstrated that the mitochondrial metabolite itaconate causes Krebs  
56 cycle break and modulates inflammatory response. Itaconate inhibits glycolysis flux and oxidative  
57 stress, limiting the inflammatory setting in macrophages and microglia (Lampropoulou et al., 2016;  
58 Pan et al., 2023). Similarly, forcing mitochondrial oxidative metabolism improves the inflammatory  
59 phenotype in macrophages. It has been reported that microbiota-derived short-chain fatty acid  
60 (SCFA) butyrate enhances oxidative metabolism and uncouples Krebs cycle from glycolytic flux in  
61 immune cells (Bachem et al., 2019). Butyrate had a neuroprotective impact on mouse models of  
62 Parkinson's disease, likely due to the downstream regulation of gut microbiota and inhibition of gut-  
63 brain axis inflammation (Guo et al., 2023). Butyrate reduces neuroinflammation and microglia  
64 activation in several experimental models of disease (Caetano-Silva et al., 2023; Huuskonen et al.,  
65 2004; Wenzel et al., 2020). Butyrate has been identified as a high-affinity ligand for the Gi-linked  
66 heterotrimeric guanine nucleotide-binding protein-coupled receptor (GPCR) hydroxycarboxylic acid  
67 receptor 2 (HCAR2) (Carretta et al., 2021), which is expressed in the brain and has been shown to  
68 modulate microglial actions in several neuroinflammatory diseases such as multiple sclerosis,  
69 Parkinson's disease, Alzheimer's disease (Moutinho et al., 2022; Offermanns, 2014). Recently,  
70 diminished abundance of butyrate-producing bacteria has been demonstrated in a mouse model of  
71 FRDA (Turchi et al., 2023). Dietary butyrate supplementation in FRDA mice limited macrophage  
72 activation in white adipose tissue and in bone marrow-derived macrophages, suggesting that this  
73 molecule could be also efficient in mitigating neuroinflammation and neurobehavior disability.  
74 Herein we demonstrated the FXN loss causes an immunometabolic derangement in microglial cells  
75 enhancing glucose catabolism to sustain a strong inflammatory phenotype. This evidence was  
76 corroborated in an *in vivo* model of FRDA. Butyrate effectively restored the immunometabolic  
77 defects both *in vitro* and *in vivo* improving the neuromotor abilities in the FRDA mouse model.

78

## 79 **RESULTS**

### 80 **Frataxin deficiency activates cerebellar microglia of KIKO mice**

81 Although genetic deficiency of the mitochondrial protein FXN is causative of FRDA-related  
82 symptoms, the disease-specific cell types in cerebellum are unknown yet. Herein we used a  
83 comparative single cell RNA-sequencing (scRNA-seq) between cerebellum of WT and KIKO mice  
84 at the early stage of FRDA disease (6-months old). ScRNA-seq analysis led to the identification of  
85 a total of 4484 quality control (QC)-positive cells. Based on the expression levels of the most variable  
86 genes, we annotated homogeneous and robust cluster of cells from scRNA-seq data, resulting in 11  
87 group of cells such as granule cells (GC), T cells, oligodendrocytes, NK cells,  
88 microglia/macrophages, fibroblasts, ependymal cells, external granular layer cells (EGL), choroid

89 plexus cells, blood cells, astrocytes (**Fig. 1A** and **Fig. 1B**). To avoid subjectivity and to add strength  
90 to the analyses, we also performed reference-based single-cell annotation, which confirmed our broad  
91 clusters of cell populations. Next, by using cell-marker gene, we compared the cell clusters between  
92 genotype and we found a contraction of choroid plexus cells, astrocytes and oligodendrocytes (**Fig.**  
93 **1C**). Oppositely, increased markers of microglia/macrophage population in cerebellum of KIKO were  
94 observed (**Fig. 1B** and **Supplemental Fig. 1A**). Consistently, the gene ontology (GO) terms for  
95 biological processes revealed an enrichment in the inflammatory process and downregulation of  
96 mitochondrial oxidative genes (**Fig. 1D**).

97 Microglia are the primary innate immune cells of the central nervous system (CNS) that are  
98 sentinels participating in the inflammatory and cell clearance response (Norris and Kipnis, 2019). To  
99 corroborate the microglia dynamics of KIKO mice, we performed a high dimensional flow cytometry  
100 analysis (**Fig. 2A**) and we observed that although the percentage of cerebellar CD45<sup>low</sup>CD11b<sup>+</sup>  
101 microglia remained preserved, a higher expression of M1-like markers (CD86<sup>+</sup> and MHC-II) and a  
102 concomitant lower expression of M2-like marker CD206 was observed in microglial cells of KIKO  
103 compared to WT (**Fig. 2B**). No changes were observed in the percentages of neutrophils  
104 (CD45<sup>+</sup>/CD11b<sup>-</sup>/CD3<sup>-</sup>/NK1.1<sup>+</sup>/CD90.2<sup>-</sup> cells) and B cells (CD45<sup>+</sup>/CD11b<sup>-</sup>/BB220<sup>+</sup>/Ly6G<sup>+</sup> cells)  
105 (**Supplemental Fig. 1B**), whereas a significant increase was detected in T cells (CD45<sup>+</sup>/CD11b<sup>-</sup>  
106 /BB220<sup>-</sup>/Ly6G<sup>-</sup>/CD3<sup>+</sup>/CD90.2<sup>+</sup> cells) (**Supplemental Fig. 1C**). Next, to explore the molecular  
107 signatures of microglia, cerebella CD45<sup>+</sup>/CD11b<sup>+</sup> cells were isolated by magnetic cell sorting and  
108 their transcriptome was profiled by bulk RNA-sequencing. We identified n=1275 differentially  
109 expressed genes ( $-0.75 > \text{Log}_2\text{FC} > +0.75$ ;  $p < 0.05$ ) between cerebella microglia of KIKO vs WT mice  
110 (**Fig. 2C**). GO terms for biological processes of the top 200 down-regulated genes (orange bars)  
111 revealed a reduced mitochondrial oxidative capacity in microglia/macrophages of KIKO mice (**Fig.**  
112 **2D**); in an opposite manner, the top 200 up-regulated genes (green bars) pertained to inflammatory  
113 processes as well as response to inflammatory stimuli (**Fig. 2E**). These results suggest a limited  
114 mitochondrial oxidative capacity with an increased inflammatory phenotype in microglia of KIKO  
115 mice.

### 116 117 **Loss of frataxin enhance glucose catabolism in microglial cells**

118 To give more insight to the molecular mechanisms leading to inflammatory activation observed in  
119 KIKO-derived microglia cells, we generated a FRDA cell model by stably downregulating FXN in a  
120 microglia cell line (BV2<sup>FXN<sup>-</sup></sup>). Although, the analysis of the inflammatory profile did not reveal any  
121 difference between controls (BV2<sup>SCR</sup>) and BV2<sup>FXN<sup>-</sup></sup> cells (**Fig. 3A**), under basal conditions, the highest  
122 inflammatory susceptibility was observed when BV2<sup>FXN<sup>-</sup></sup> cells were activated with liposaccharides  
123 (LPS) (**Fig. 3A**). These results suggest that activated BV2<sup>FXN<sup>-</sup></sup> better phenocopy the inflammatory  
124 setting observed in cerebella microglia of KIKO mice.

125 It has been demonstrated that a sustained inflammatory status of macrophages is characterized  
126 by metabolic shift from oxidative phosphorylation (OXPHOS) to glycolysis. To test if a metabolic  
127 rearrangement occurs in FXN downregulating microglia, we measured glycolysis- and TCA-related  
128 metabolites in BV2<sup>FXN<sup>-</sup></sup> cells. Notably, mitochondrial metabolites including acetyl-CoA, citrate,  $\alpha$ -  
129 ketoglutarate ( $\alpha$ KG), oxaloacetate, succinate and malate were unchanged in activated BV2<sup>FXN<sup>-</sup></sup> cells  
130 (**Fig. 3B**). On the contrary, glucose uptake (**Fig. 3C**), accumulation of glycolysis and pentose-  
131 phosphate shunt metabolites (**Fig. 3D**) as well as lactate production (**Fig. 3E**) were significantly  
132 increased. These results were consistent with the glucose avidity of inflammatory immune cells (Soto-

133 Heredero et al., 2020). With the aim to explore if the inflammatory phenotype of BV2<sup>FXN</sup>- cells was  
134 dependent on glycolysis, we inhibited glucose uptake by 2-deoxyglucose (2-DG) and as reported in  
135 the **Suppl. Fig. 2A**, a reduced inflammatory response to LPS was observed.

136  
137

### 138 **Itaconate reduces the inflammatory responses in microglia downregulating FXN through Nrf2** 139 **pathway**

140 Itaconate is a mitochondrial metabolite produced in macrophages as response to inflammatory stimuli  
141 (Lampropoulou *et al.*, 2016). To test if the highest inflammatory phenotype of BV2<sup>FXN</sup>- cells was also  
142 associated with itaconate overproduction, we measured its levels, and a significant increase was  
143 detected compared to scramble conditions (with or without LPS) (**Fig. 4A**). Itaconate overproduction  
144 observed in BV2<sup>FXN</sup>- cells was in accordance with the increased expression levels the immune-  
145 responsive gene 1 (*Irg1*) (**Fig. 4B**), the mitochondrial enzyme catalyzing the decarboxylation of cis-  
146 aconitate to synthesize itaconate (Lampropoulou *et al.*, 2016). Remarkably, higher *Irg1* expression  
147 levels were also detected in cerebellum-derived microglia (**Fig. 4C**) as well as in total cerebellum of  
148 KIKO than WT mice (**Fig. 4D**). It has been reported that itaconate production following inflammatory  
149 stimuli mitigates the inflammatory response by constraining *Il1b* induction and glycolysis  
150 (Lampropoulou *et al.*, 2016). To test if itaconate exerts such effect in activated BV2<sup>FXN</sup>- cells, a cell  
151 permeable formulation of soluble itaconate (dimethylitaconate: DMI) was added to the culture  
152 medium. As expected, DMI diminished *Il1β*, *Il6* and *Nos2* levels (**Fig. 4E**) as well as glucose  
153 catabolism in BV2<sup>FXN</sup>- cells (**Fig. 4F**). It has been demonstrated that itaconate exerts its anti-  
154 inflammatory effect by *Nrf2* induction (Mills *et al.*, 2018).

155

### 156 **Butyrate reverts the immunometabolic signatures through Itaconate/Nrf2/GSH signaling.**

157 Butyrate is a ubiquitous short-chain fatty acid principally derived from the enteric microbiome, which  
158 showed a neuroprotective role (Lanza *et al.*, 2019; Li *et al.*, 2016). Metabolomic analysis of butyrate-  
159 treated macrophages revealed a substantial reduction in glycolysis (Flemming, 2019; Schulthess *et*  
160 *al.*, 2019) as well as limited inflammatory response in microglia (Caetano-Silva *et al.*, 2023). By  
161 virtue of the recently demonstrated anti-inflammatory effects of BUT on white adipocytes and  
162 BMDM of KIKO mice (Turchi *et al.*, 2023), we asked if butyrate treatment was also effective in  
163 counteracting the changes of the immunometabolic profile in activated BV2<sup>FXN</sup>-. As reported in **Fig.**  
164 **5A**, butyrate reduced glucose uptake and lowered lactate production in activated BV2<sup>FXN</sup>- cells,  
165 whereas a significant refill in the mitochondrial metabolites such as citrate, oxaloacetate and succinate  
166 was observed (**Fig. 5B**). Notably, butyrate further increased itaconate levels in BV2<sup>FXN</sup>- (**Fig. 5C**),  
167 leading us to suppose that butyrate promotes an anti-inflammatory effect by the itaconate-driven  
168 antioxidant protection. To test this hypothesis, we analyzed *Nrf2* protein in BV2<sup>FXN</sup>- cells treated with  
169 butyrate and expectedly an increased nuclear accumulation of *Nrf2* was observed (**Fig. 5D**). *Nrf2* is  
170 the primary transcription factor protecting cells from oxidative stress by regulating the synthesis of  
171 glutathione (GSH) (Harvey *et al.*, 2009). Interestingly, butyrate increased GSH levels in BV2<sup>FXN</sup>-  
172 cells (**Fig. 5E**).

173 In order to decipher the molecular mechanism driving the anti-inflammatory effect of butyrate,  
174 we analyzed the transcriptomics responses to butyrate in BV2<sup>FXN</sup>- (**Fig. 5F**) and KIKO-derived  
175 microglial cells (**Fig. 5G**). The genes that were significantly downregulated ( $\text{Log}_2\text{FC} < -1.5$ ) by  
176 butyrate were integrated by Venn diagram (**Fig. 5H**) and their functional enrichment analysis

177 suggested that butyrate inhibits NfκB signaling pathway in microglia with FXN deficiency (**Fig. 5I**).  
178 Consistently, a diminished level of the phospho-active form of Nf-κb was observed in activated  
179 BV2<sup>FXN</sup>- treated with butyrate (**Fig. 5J**). To demonstrate the anti-inflammatory effects of butyrate *in*  
180 *vivo*, asymptomatic 4-months-old KIKO mice were fed with dietary BUT for 16 weeks and at the end  
181 of dietary treatment, the transcriptome of CD11b<sup>+</sup> microglial cells isolated from cerebellum, was  
182 profiled. In accordance with *in vitro* data, KIKO-derived CD11b<sup>+</sup> microglial cells showed a reduced  
183 expression level of inflammatory genes following dietary BUT treatment (**Suppl. Fig. 2B**).

184

### 185 **Butyrate improves the neuromotor abilities in KIKO mice**

186 Next, we asked if the improvement of the neuroinflammatory status of BUT-treated mice was  
187 accompanied by improved neuromotor abilities. To this end, a battery of neuromotor tasks including  
188 accelerating rotarod test (Bohlen et al., 2009), pole tests (turning time and climb down time) (Que et  
189 al., 2021) and tightrope test (Miquel and Blasco, 1978) were conducted in KIKO mice at the end of  
190 dietary treatment. The rotarod test revealed lower neuromotor capacity in KIKO mice compared to  
191 the WT mice when the mice ran at maximum RPM (**Fig. 6A**). Nicely, butyrate treatment was effective  
192 in limiting KIKO falls (**Fig. 6A**). Similar results were observed following pole test, in which KIKO  
193 mice showed a highest time to turn completely downward (Tturn) and to descend to the floor (Ttotal)  
194 than WT mice (**Fig. 6B**). Although butyrate treatment was effective in improving Tturn (**Fig. 6B**), no  
195 improvement was observed in Ttotal (**Fig. 6B**). Restored neurobehavioral abilities were also observed  
196 at the tightrope test, in which butyrate reduced the higher walking time of KIKO than WT mice (**Fig.**  
197 **6C**). These results suggest that dietary butyrate improves neuromotor abilities through  
198 neuroinflammatory limitation in FRDA mice.

199

### 200 **Hcar2 mediates the anti-inflammatory effects of butyrate**

201 Butyrate interacts with several G-protein coupled receptors including GPR109A (encoded by Hcar2  
202 gene), GPR43 (encoded by Ffar2 gene) and GPR41 (encoded by Ffar3 gene) leading to activation of  
203 anti-inflammatory signaling cascades (Deleu et al., 2021; Parada Venegas et al., 2019). Through  
204 According to what previously reported (Moutinho *et al.*, 2022), our scRNAseq data revealed that  
205 among these receptors Hcar2 was expressed at the highest values in microglia (**Fig. 7A**). Interestingly,  
206 the Hcar2 expression was higher in in KIKO than WT mice (**Fig. 7B**), suggesting an increased  
207 sensitivity to butyrate in FRDA mice. Remarkably, Hcar2 levels were increased in primary microglia  
208 isolated from cerebellum of KIKO mice (**Fig. 7C**), and butyrate treatment was effective in restraining  
209 its upregulation (**Fig. 7C**). In line with these findings, butyrate limited the expression levels of Hcar2  
210 in activated BV2<sup>FXN</sup>- cells (**Fig. 7D**). To investigate if Hcar2 mediates the anti-inflammatory effects  
211 of butyrate, we downregulated Hcar2 in butyrate-pre-treated BV2<sup>FXN</sup>- cells and the inflammatory  
212 genes expression was analyzed following LPS stimulation. Consistent with our hypothesis, butyrate  
213 was ineffective in limiting inflammatory response in Hcar2 downregulating cells (**Fig. 7E**).

214

215

## 216 **DISCUSSION**

217 FXN deficiency caused excess microglial DNA damage and inflammation in murine model of FRDA  
218 (Shen *et al.*, 2016). Remarkably, the transcriptional profile of PBMC isolated from FRDA patients,  
219 revealed a strong enrichment for an inflammatory innate immune response (Nachun et al., 2018).  
220 Although high inflammatory susceptibility was described in FRDA mice and human (Khan *et al.*,

221 2022; Shen *et al.*, 2016; Turchi *et al.*, 2023), the mechanisms underlying this condition remain  
222 unexplored. Herein we demonstrated that the loss of FXN forces glycolytic catabolism promoting  
223 inflammatory phenotype in microglial cells. FXN is a mitochondrial protein and its dysfunction  
224 causes mitochondrial failure, thus recruiting glycolysis as the main source of ATP (O'Neill *et al.*,  
225 2016). This is consistent with the increased glycolysis flux occurring in M1 macrophages and  
226 microglial cells (Bernier *et al.*, 2020). Krebs cycle breaks were also described in M1 macrophages  
227 and microglia, which cause an overproduction of itaconic acid (Lampropoulou *et al.*, 2016). This  
228 mitochondrial metabolite has been shown to participate in the inflammatory response restraining IL1 $\beta$   
229 production and glycolysis. Itaconate and its derivatives showed antiinflammatory effects in  
230 preclinical models of sepsis, viral infections, psoriasis, gout, ischemia/reperfusion injury, and  
231 pulmonary fibrosis, pointing to possible itaconate-based therapeutics for a range of inflammatory  
232 diseases (Peace and O'Neill, 2022). Consistently, itaconate improved the immunometabolic profile in  
233 microglia downregulating FXN through Nrf2-mediated mechanism, highlighting itaconate as novel  
234 therapeutical option to improve FRDA-related inflammatory symptoms. It has been reported that  
235 itaconate exerts its anti-inflammatory role by activating Nrf2 (Mills *et al.*, 2018). Nrf2 controls the  
236 antioxidant responses counteracting the production of oxidatively damaged molecules through GSH  
237 synthesis (Mills *et al.*, 2018). Of note, Nrf2 is down-regulated in FRDA patients and antioxidant GSH  
238 precursors improve FRDA symptoms (La Rosa *et al.*, 2021).

239 Mounting evidence reports that gut microbiota releases immunomodulatory molecules and  
240 counteracts neuroinflammatory conditions. (Abdel-Haq *et al.*, 2019; Mou *et al.*, 2022; Richards *et al.*,  
241 2022; Sampson *et al.*, 2016). To this end targeting gut microbiota has been proposed to alleviate  
242 neuroinflammation. Recent metagenomics profiling revealed that gut microbiota of KIKO mice  
243 shows a decrement of butyrate-producing bacteria and dietary butyrate supplementation improves  
244 adipose tissue inflammation (Turchi *et al.*, 2023). Dietary butyrate ameliorates microglia-mediated  
245 neuroinflammation in several inflammatory mouse models (Jiang *et al.*, 2021; Wei *et al.*, 2023) and  
246 improves cognitive decline following neuroinflammatory neurotoxin injection (Ge *et al.*, 2023). In  
247 accordance with these data, KIKO mice treated with butyrate show reduced neuroinflammation and  
248 improvement of neurobehavioral abilities. In microglial cells downregulating FXN, we observed that  
249 butyrate improves the immunometabolic profile via itaconate/Nrf2/GSH pathway. Butyrate shows a  
250 strong chemical similarity to  $\beta$ -hydroxybutyrate, a ketone body increased in a FRDA mouse model  
251 (Dong *et al.*, 2022). However, comparative analyses revealed that butyrate exerts higher impact in  
252 terms of induction of the mitochondrial anti-oxidant genes and inhibition of pro-inflammatory genes  
253 (Chriett *et al.*, 2019). It has been suggested that the Nrf2-mediated antioxidant responses induced by  
254 butyrate are mediated by Hcar2 (also called as GPR109A) (Guo *et al.*, 2020), which is strongly  
255 expressed by CD11b microglial cells (Moutinho *et al.*, 2022). Activation of Hcar2 regulates  
256 microglial responses to alleviate neurodegeneration in LPS-induced *in vivo* and *in vitro* models (He  
257 *et al.*, 2023). In line with this, Hcar2 downregulation restrained the butyrate-mediated anti-  
258 inflammatory responses in FXN-deficient microglia.

259 The current study provides compelling evidence that the loss of FXN is associated with a disruption  
260 in mitochondrial activity, rendering microglial cells highly susceptible to inflammatory responses.  
261 Furthermore, our research indicates that itaconate plays a pivotal role in mitigating this inflammatory  
262 cascade through a Nrf2-mediated mechanism. While the anti-inflammatory properties of butyrate  
263 have been extensively documented, our study showcases its remarkable ability to ameliorate the  
264 neuroinflammatory phenotype through Hcar2-mediated itaconate/Nrf2/GSH signaling pathway.

265 Remarkably, dietary supplementation of butyrate also demonstrated efficacy in enhancing  
266 neuromotor function in a FRDA mouse model. These findings suggest that butyrate holds significant  
267 promise as a readily accessible and safe therapeutic option for alleviating FRDA neurological  
268 symptoms.

269

## 270 **MATERIALS AND METHODS**

271

### 272 **Mice and Treatments**

#### 273 **WT and KIKO mice**

274 Mouse experimentation was carried out in strict accordance with established standards for the humane  
275 care of animals, following approval by the relevant local authorities, including the Institutional  
276 Animal Care and Use Committee at Tor Vergata University, and national regulatory bodies (Ministry  
277 of Health, licenses no. 324/218-PR and no. 210/202-PR). Both female and male mice were housed in  
278 controlled conditions, with a temperature of 21.0°C and a relative humidity of 55.0% ± 5.0%, all  
279 while adhering to a 12-hour light/12-hour dark cycle (lights on at 6:00 a.m., lights off at 6:00 p.m.).  
280 They were provided with unrestricted access to food and water, and all experimental procedures were  
281 conducted in accordance with institutional safety protocols. The female and male Knock-in Knock-  
282 out (KIKO) mice were obtained from Jackson Laboratories (#012329), while their female and male  
283 littermate C57BL/6 counterparts (WT) were utilized as control subjects. During testing, the  
284 researchers were unaware of the genotypes to ensure unbiased results.

285 The supplementation of butyrate in male mice was performed as previously reported (Turchi  
286 *et al.*, 2023). Sodium butyrate was incorporated into their food pellets (at a rate of 5 g per kg per day,  
287 consistent with their regular daily caloric intake) starting at 4 months of age. This age was selected  
288 as it precedes the onset of metabolic changes and continued until the mice reached 8 months of age,  
289 which corresponds to a 16-week treatment period. This timeline was chosen because it coincides with  
290 the point at which mice typically begin to display metabolic alterations and weight gain. At 8 months  
291 of age, the mice were sacrificed by cervical dislocation and cerebellum was immediately processed  
292 or stored at -80°C for subsequent analysis.

293

#### 294 **Neurobehavioral Tests**

295 Before rotarod testing, mice were trained for one day on the rotarod at a constant speed of 7 rpm over  
296 1 min, repeated four times. On the day of testing, each mouse was placed on a stationary rod which  
297 was then accelerated from 7 rpm to 32 rpm over 5 min. The latency to fall was recorded. This was  
298 done over three trials with 60-minute inter-trial intervals.

299 Before pole testing, mice were acclimated to a wooden pole measuring 30 cm x 1 cm. For the turning  
300 time assessment, each mouse was placed head upwards at the top of the pole. The time taken for the  
301 mouse to turn 180 degrees downward was recorded. The descent time, from turning to reaching the  
302 base of the pole, was subsequently documented.

303 For tightrope test, a rope measuring 60 cm in length and 1 cm in diameter was securely stretched  
304 between two platforms. Each mouse was placed at the center of the rope, and the time taken to reach  
305 either platform was noted. This procedure was repeated over three trials with 30-minute intervals  
306 between trials.

307

308

## 309 **Cells and Treatments**

### 310 **Primary Microglia Isolation and BV2 cell line**

311 Primary microglia from the cerebellum were isolated following a previously described method  
312 (Apolloni et al., 2013). In brief, mice at 5-6 days of age (p6) were euthanized, and the meninges were  
313 carefully removed. The cerebellum was then finely chopped and subjected to digestion using 0.01%  
314 trypsin and 10 µg/ml DNaseI. After dissociation and filtration through 70 µm filters, cells were  
315 suspended in DMEM/F-12 media supplemented with GlutaMAX™ (Gibco, Invitrogen, UK). This  
316 media was further supplemented with 10% fetal bovine serum (FBS), 100 Units/ml of gentamicin,  
317 and 100 µg/ml of streptomycin/penicillin. The cells were plated at a density of 62,500 cells per cm<sup>2</sup>.  
318 After approximately 15 days, a gentle trypsinization was performed using DMEM/F-12 without FBS  
319 (0.08% trypsin in DMEM/F-12 without FBS) for 40 minutes at 37°C to eliminate non-microglial  
320 cells. The resulting adherent microglial cells, which were highly pure (>98%), were then cultured in  
321 a mixture of glial cell-conditioned medium (50%) at 37°C in an atmosphere containing 5% CO<sub>2</sub> for  
322 48 hours prior to use.

323 To isolate cerebella microglia by magnetic cell sorting, cerebellum homogenate as  
324 resuspended in 500 mL of magnetic bead buffer (MBB) consisting of PBS without calcium and  
325 magnesium, 0.5% w/v bovine serum albumin (BSA), and 2 mM ethylenediaminetetraacetic acid  
326 (EDTA). The cell suspension was then filtered through a 30-mm pre-separation filter (Miltenyi,  
327 Bergisch Gladbach, Germany) following three filter washes to remove any large particles and debris.  
328 The resulting cell suspension was then separated at 300 x g for 5 min at 4°C and resuspended in MBB  
329 along with antiCD45 magnetic beads-conjugated antibody (Miltenyi). The cell suspension was  
330 incubated for 15 min at 4°C, then diluted with 2 mL of MBB and centrifuged. The resulting cell pellet  
331 was resuspended in 500 mL of MBB, applied onto hydrated MS-columns (Miltenyi), washed three  
332 times with 500 mL of MBB, and collected with 1 mL of MBB through piston elution. CD45+ cells  
333 resuspended in MBB along with antiCD11b magnetic beads-conjugated antibody (Miltenyi). The cell  
334 suspension was incubated for 15 min at 4°C, then diluted with MBB and centrifuged. The resulting  
335 cell pellet was resuspended in 500 mL of MBB, applied onto hydrated MS-columns (Miltenyi),  
336 washed three times with 500 mL of MBB, and collected with 1 mL of MBB through piston elution  
337 to obtain CD45+/CD11b+ cells.

338 Murine BV2 cell line (ATCC) was cultured in DMEM supplemented with 10% FBS and 1%  
339 P/S (Life Technologies) and 1% non-essential amino acids (Euroclone). All cells were maintained at  
340 37°C in a humidified incubator containing 5% CO<sub>2</sub>. For gene silencing, BV2 cells were seeded 20000  
341 cell/well. Twenty-four hours after plating, BV2 cells were infected with 25 MOI of FXN shRNA or  
342 scramble shRNA (Origene, Rockville, MD, USA) for a total of 500000 viral particles/well. To  
343 facilitate viral particle entry in the cells 2µg/mL polybrene (Sigma Aldrich) we added to the culture  
344 media. BV2 cells treated with 500 ng/mL lipopolysaccharides (LPS) for 16 h. Sodium butyrate (BUT,  
345 500µM) was added 3 hours before LPS treatment and maintained throughout the experiment. The sodium  
346 butyrate concentration was selected based on dose-response experiments conducted on primary  
347 adipocytes or bone marrow-derive macrophages stimulated with LPS (500 ng/mL, 16 h). These  
348 experiments demonstrated the anti-inflammatory action of the 500 mM concentration while  
349 preserving cell viability (Turchi *et al.*, 2023).

350

351

352



### 353 **Single Cell RNA-sequencing**

354 Single-cell suspensions were prepared for scRNA-seq immediately after cell sorting using the  
355 Chromium Single-Cell Reagent Kit from 10x Genomics, following the manufacturer's protocol. After  
356 cell capture and lysis, cDNA was synthesized for each group of captured cells and underwent 12  
357 cycles of amplification. The amplified cDNA from each channel of the Chromium system was utilized  
358 to construct an Illumina sequencing library, which was sequenced using the NovaSeq 6000, resulting  
359 in approximately 300 million reads per library with a 2x50 read length. Raw reads were aligned to  
360 the *Mus musculus* (mm10) reference genome, and cells were identified using CellRanger count  
361 v.7.1.0. Individual samples were combined to create a merged digital expression matrix. The  
362 barcodes, features, and matrix files generated by the CellRanger software were used as input for the  
363 R program Seurat v4.4.0, (Satija et al., 2015). Low-quality cells were filtered out, retaining only cells  
364 with more than 500 features, gene counts greater than 1000, and mitochondrial content less than 10%.  
365 Outliers, defined as cells with more than 10,000 features and counts exceeding 20,000, were removed,  
366 while retaining genes expressed in at least three cells. This filtering step resulted in 2,400 cells from  
367 each sample, which were then merged into a single dataset. Expression levels were normalized using  
368 logarithmic transformation. The most variable genes (2,000 features) were selected, and their  
369 expressions were scaled across all cells. The dimensionality of the dataset was assessed through  
370 Principal Component Analysis (PCA), and the first 20 principal components were used to create a  
371 UMAP reduction. Clustering was performed with a resolution parameter set to 0.5. Differentially  
372 expressed genes within each cluster were identified using the Wilcoxon rank sum test. Manual cluster  
373 labeling was conducted, and annotations were confirmed using the SingleR package with CellDex  
374 libraries v1.10.1, (Aran et al., 2019). Enrichment analysis was carried out using ClusterProfileR  
375 v4.4.4, PMID: 22455463), which identified the top-5 activated and top-5 suppressed Gene Ontology  
376 Biological Processes terms using the gseGO function. Subsequently, the Microglia cluster was  
377 isolated from the main dataset and subjected to full reprocessing. Single-cell plots were generated  
378 using the GGPlot2 package v3.4.4.

379

### 380 **Bulk RNA-sequencing**

381 Total RNAs were extracted from cells and tissues employing the MiniPrep kit from ZYMO  
382 RESEARCH, in adherence to the manufacturer's instructions. The quantification of total RNA was  
383 performed using the Qubit 4.0 fluorimetric Assay from Thermo Fisher Scientific. Libraries were  
384 constructed from 50 ng of total RNA through the NEGEDIA Digital mRNA-seq research grade  
385 sequencing service provided by Next Generation Diagnostic srl. This service encompassed library  
386 preparation, quality assessment, and sequencing on an Illumina NovaSeq 6000 system utilizing a  
387 single-end, 75-cycle strategy. The raw data underwent analysis with FastQC v0.12.0 and were  
388 subsequently subjected to quality filtering and trimming by Trimmomatic v0.39, (Bolger et al., 2014),  
389 employing a Q30 threshold for both leading and trailing ends, with a minimum length of 15  
390 nucleotides. The resultant reads were aligned to the reference genome (mm10) using HISAT2 v2.2.1  
391 (Kim et al., 2019). Quantification of gene expression was accomplished using the featureCounts tool  
392 (Liao et al., 2014). Subsequently, the DESeq2 package v1.40.2 (Love et al., 2014) was employed to  
393 calculate differentially expressed genes (DEGs) and normalize the expression count matrix.  
394 Functional enrichment analysis was carried out using EnrichR or FunRich 3.0 with the Biological  
395 Processes Gene Ontology (GO) database.

396

### 397 **Immunophenotyping by Flow Cytometry**

398 Cerebellum was immunophenotyped by high dimensional flow cytometry using a panel containing  
399 markers to identify cell types and to assess activation states. The use of these markers allowed us to  
400 exclude all cells of no interest based on physical parameters (side and forward scatter) and to gate on  
401 specific cells of interest. In particular, cerebellum of WT and KIKO mice was dissociated to single-  
402 cell suspension using adult brain dissociation kit from MACS Technology and using GentleMACS  
403 (Miltenyi Biotec), according to the manufacturer's protocol. Cells were first gated on CD45<sup>+</sup> cells and  
404 then on CD45<sup>low</sup>CD11b<sup>+</sup> to identify microglial cells and to exclude infiltrated macrophages  
405 (CD45<sup>high</sup>CD11b<sup>+</sup>) and non-myeloid leukocytes (CD45<sup>high</sup>CD11b<sup>low</sup>). Microglia were further stained  
406 for the expression of M1 (anti-CD86 and anti-MHC-II) or M2 (anti-CD206 and anti-Trem2) markers.  
407 Samples were acquired on a 13-color Cytoflex (Beckman Coulter) and for each analysis, at least  
408 0.5x10<sup>6</sup> live cells were acquired by gating on aqua Live/Dead negative cells (Sciarretta et al., 2023).

409

### 410 **Targeted Metabolomics**

411 All data were acquired on a Triple Quad API3500 (AB Sciex) with an HPLC system ExionLC AC  
412 System (AB Sciex). For targeted metabolomic analysis, cells were extracted using tissue lyser for 30  
413 sec at maximum speed in 250 µL of ice-cold methanol: water: acetonitrile (55:25:20) containing [U-  
414 <sup>13</sup>C<sub>6</sub>]-glucose 1 ng/µL and [U-<sup>13</sup>C<sub>5</sub>]-glutamine 1ng/µL as internal standards (Merk Life Science,  
415 Milan, Italy). Lysates were spun at 15,000 g for 15 min at 4 °C, dried under N<sub>2</sub> flow at 40 °C and  
416 resuspended in 125 µL of ice-cold methanol/water 70:30 for subsequent analyses. Amino acids  
417 analysis was performed through the previous derivatization. Briefly, 50 µl of 5% phenyl  
418 isothiocyanate in 31.5% ethanol and 31.5% pyridine in water were added to 10 µl of each sample.  
419 Mixtures were then incubated with phenyl isothiocyanate solution for 20 min at room temperature,  
420 dried under N<sub>2</sub> flow, and suspended in 100 µl of 5 mM ammonium acetate in methanol/ H<sub>2</sub>O 1:1.  
421 Quantification of different amino acids was performed by using a C18 column (Biocrates, Innsbruck,  
422 Austria) maintained at 50 °C. The mobile phases were phase A: 0.2% formic acid in water and phase  
423 B: 0.2% formic acid in acetonitrile. The gradient was T<sub>0</sub>: 100% A, T<sub>5.5</sub>: 5% A and T<sub>7</sub>: 100% A with  
424 a flow rate of 500µL/min. Measurement of energy metabolites and cofactors was performed by using  
425 a cyano-phase LUNA column (50 mm × 4.6 mm, 5 µm; Phenomenex, Bologna, Italy), maintained at  
426 53°C, by a 5 min run in negative ion mode. The mobile phase A was water, while phase B was 2 mM  
427 ammonium acetate in MeOH, and the gradient was 50% A and 50% B for the whole analysis, with a  
428 flow rate of 500 µL/min. Acylcarnitines quantification was performed using a ZORBAX SB-CN  
429 2.1x150mm, 5µm column (Agilent, Milan, Italy). Samples were analyzed by a 10 min run in positive  
430 ion mode. The mobile phases were phase A: 0.2% formic acid in water and phase B: 0.2% formic  
431 acid in acetonitrile. The gradient was T<sub>0</sub>: 100% A, T<sub>5.5</sub>: 5% A and T<sub>7</sub>: 100% A with a flow rate of  
432 350µL/min. All metabolites analyzed were previously validated by pure standards, and internal  
433 standards were used to check instrument sensitivity. MultiQuant software (version 3.0.3, AB Sciex)  
434 was used for data analysis and peak review of chromatograms. Data were normalized on the median  
435 of the areas and then used to perform the statistical analysis.

436

### 437 **Lactate Production and Glucose Uptake**

438 Extracellular lactate levels were assessed in the culture medium via an enzyme-based  
439 spectrophotometric assay. The procedure involved the collection of cell media, followed by treatment  
440 with a 1:2 (v/v) solution of 30% trichloroacetic acid to precipitate proteins. Afterward, the resulting

441 mixture was subjected to centrifugation at 14,000 x g for 20 minutes at 4°C, and the supernatant was  
442 carefully collected. Subsequently, the collected supernatant was incubated for 30 minutes at 37°C  
443 with a reaction buffer containing glycine, hydrazine, NAD<sup>+</sup> (nicotinamide adenine dinucleotide), and  
444 LDH (lactate dehydrogenase) enzyme. This incubation allowed for the conversion of lactate to  
445 pyruvate, while simultaneously reducing NAD<sup>+</sup> to NADH. The concentration of NADH, which is  
446 stoichiometrically equivalent to the amount of lactate, was then determined at 340 nm using a  
447 spectrophotometer.

448 To monitor glucose uptake, 2-NBDG probes were used according to manufactures protocols. Flow  
449 cytometry analyses were performed by 13-color Cytoflex (Beckman Coulter) and the percentage of  
450 2-NBDG-positive cells was calculated by FlowJo software.

451

### 452 **Quantitative PCR**

453 The total RNA was isolated using TRI Reagent (Sigma-Aldrich). Subsequently, 3 mg of RNA was  
454 reverse-transcribed with M-MLV (Promega, Madison, WI). Quantitative PCR (qPCR) was performed  
455 in triplicate, using validated qPCR primers confirmed via BLAST searches. The Applied Biosystems  
456 Power SYBR Green Master Mix was employed, along with the QuantStudio3 Real-Time PCR System  
457 (ThermoFisher, Waltham, MA, USA). mRNA levels were normalized to actin mRNA, and the  
458 relative mRNA levels were determined using the 2<sup>-ΔΔCt</sup> method. The primers used for reverse  
459 transcription quantitative PCR (RT-qPCR) are as follows:

460 Fxn:

461 Forward: 5'-TCTCTTTTGGGGATGGCGTG-3'

462 Reverse: 5'-GCTTGTTTGGGGTCTGCTTG-3'

463

464 Il1b:

465 Forward: 5'-TGCACCTTTTGACAGTGATG-3'

466 Reverse: 5'-AAGGTCCACGGGAAAGACAC-3'

467

468 Il6:

469 Forward: 5'-GGATACCACTCCCAACAGA-3'

470 Reverse: 5'-GCCATTGCACAACCTCTTTTCTCA-3'

471

472 Rpl8:

473 Forward: 5'-GGAGCGACACGGCTACATTA-3'

474 Reverse: 5'-CCGATATTCAGCTGGGCCTT-3'

475

476 Nos2:

477 Forward: 5'-GCCTTCAACACCAAGGTTGTC-3'

478 Reverse: 5'-ACCACCAGCAGTAGTTGCTC-3'

479

480 Hcar2:

481 Forward: 5'-GAGCAGTTTTGGTTGCGAGG-3'

482 Reverse: 5'-GGGTGCATCTGGGACTCAAA-3'

483

484

485 Irg1:  
486 Forward: 5'-GCAACATGATGCTCAAGTC-3'  
487 Reverse: 5'-TGCTCCTCCGAATGATACCA-3'  
488  
489 Tnfa:  
490 Forward: 5'-ATGGCCTCCTCATCAGTT C-3'  
491 Reverse: 5'-TTGGTTTGCTACGACGTG-3'

492

### 493 **Immunoblotting**

494 Tissues or cells were lysed in RIPA buffer containing 50 mM Tris-HCl (pH 8.0), 150 mM NaCl, 12  
495 mM deoxycholic acid, 0.5% Nonidet P-40, as well as protease and phosphatase inhibitors. Next, 5  
496 mg of proteins were loaded onto an SDS-PAGE gel and subjected to Western blotting. Nitrocellulose  
497 membranes were subsequently incubated with primary antibodies at a 1:1000 dilution. Following this,  
498 the membranes were incubated with the appropriate horseradish peroxidase-conjugated secondary  
499 antibodies. Immunoreactive bands were detected using a FluorChem FC3 System (Protein-Simple,  
500 San Jose, CA, USA) after the membranes were incubated with ECL Prime Western Blotting Reagent  
501 (GE Healthcare, Pittsburgh, PA, USA). Densitometric analysis of the immunoreactive bands was  
502 performed using the FluorChem FC3 Analysis Software.

503

### 504 **Statistical analysis**

505 The data were presented as the mean  $\pm$  standard deviation. The specific number of replicates for each  
506 dataset is provided in the corresponding figure legend. To evaluate the statistical significance between  
507 two groups, a two-tailed unpaired Student's t-test was conducted. For comparisons involving three or  
508 more groups, an analysis of variance (ANOVA) was performed, followed by either Dunnett's test (for  
509 comparisons relative to controls) or Tukey's test (for multiple comparisons among groups). These  
510 statistical analyses were carried out using GraphPad Prism 9 (GraphPad Software Inc., San Diego,  
511 CA, USA). In all instances, a significance threshold of  $p < 0.05$  was set.

512

### 513 **ACKNOWLEDGEMENTS**

514 This work was supported by Friedreich's Ataxia Research Alliance (FARA)-General Research  
515 Grant 2021 to D.L.-B. Other supports: Progetto Giovani Ricercatori, Italian Ministry of Health  
516 (GR-2018-12367588) to D.L.-B.; FARA-General Research Grant 2020 to KA; Office of the  
517 Assistant Secretary of Defense for Health Affairs endorsed by Department of Defense (USA)  
518 through the Congressionally Directed Medical Research Programs Award (No. HT9425-23-1-0005)  
519 to K.A and D.L.-B.; National Ataxia Foundation (NAF) (821396[RG]) to N.D.A.;

520 #NEXTGENERATIONEU (NGEU) - Ministry of University and Research (MUR), National  
521 Recovery and Resilience Plan (NRRP), project MNESYS (PE0000006), A Multiscale integrated  
522 approach to the study of the nervous system in health and disease (DN. 1553 11.10.2022) to D.L.-B,  
523 K.A and N.D.A. Ministry of University and Research (MUR) Progetto Eccellenza (2023–2027) to  
524 the Department of Pharmacological and Biomolecular Sciences “Rodolfo Paoletti” (S.P and N.M.),

525 Università degli Studi di Milano and partially by the Italian Ministry of Health with Ricerca  
 526 Corrente and 5×1000 funds to NM.

527

528 **DECLARATION OF INTERESTS**

529 The authors declare no competing interests.

530

531

532 **FIGURES and FIGURE LEGENDS**

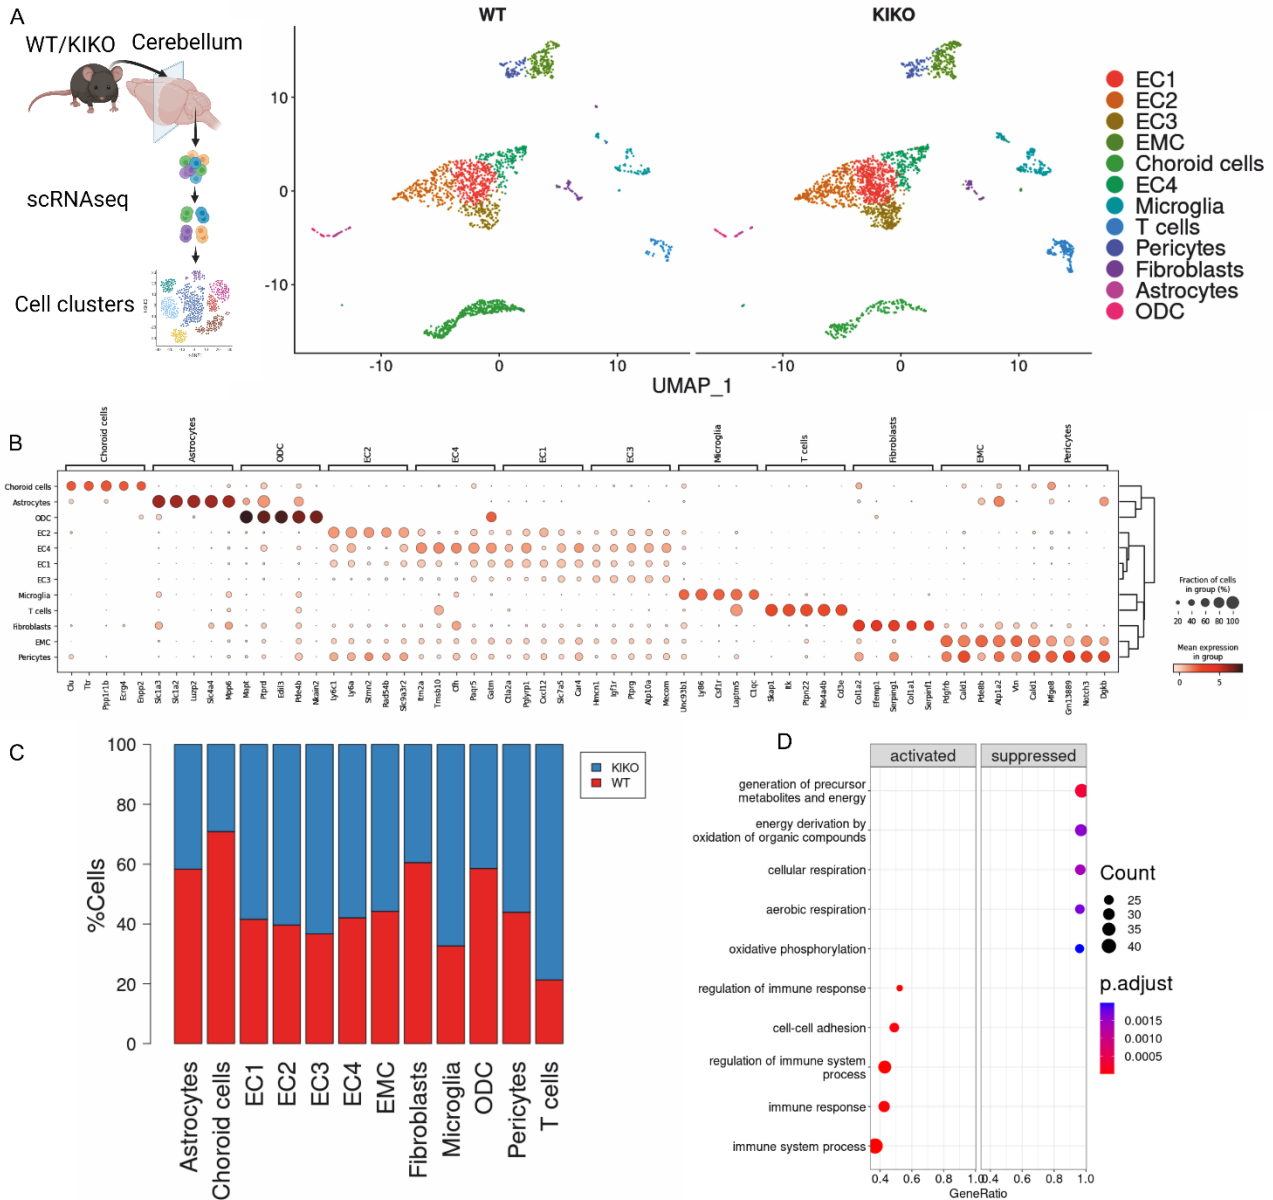

533

534 **FIGURE 1. Cerebellum in KIKO exhibits an immunometabolic disturbance.** (A) Cell clusters identified  
 535 by single cell RNA-seq of total cell fraction (TCF) isolated from cerebellum of WT and KIKO of 6 months  
 536 old mice (TCF: pool from cerebellum of n=4 mice/group). (B) Dot plots reporting gene markers for cell type  
 537 identified by single cell RNA-seq of total cell fraction (TCF) isolated from cerebellum of WT and KIKO of 6  
 538 months old mice (TCF: pool from cerebellum of n=4 mice/group). (C) Bar plots reporting cell types identified  
 539 by single cell RNA-seq of total cell fraction (TCF) isolated from cerebellum of WT and KIKO of 6 months  
 540 old mice (TCF: pool from cerebellum of n=4 mice/group) (D). Gene Ontology terms for biological processes

541 of differentially expressed genes revealed by single cell RNA-seq of total cell fraction (TCF) isolated from  
 542 cerebellum of WT and KIKO of 6 months old mice (TCF: pool from cerebellum of n=4 mice/group).  
 543  
 544  
 545

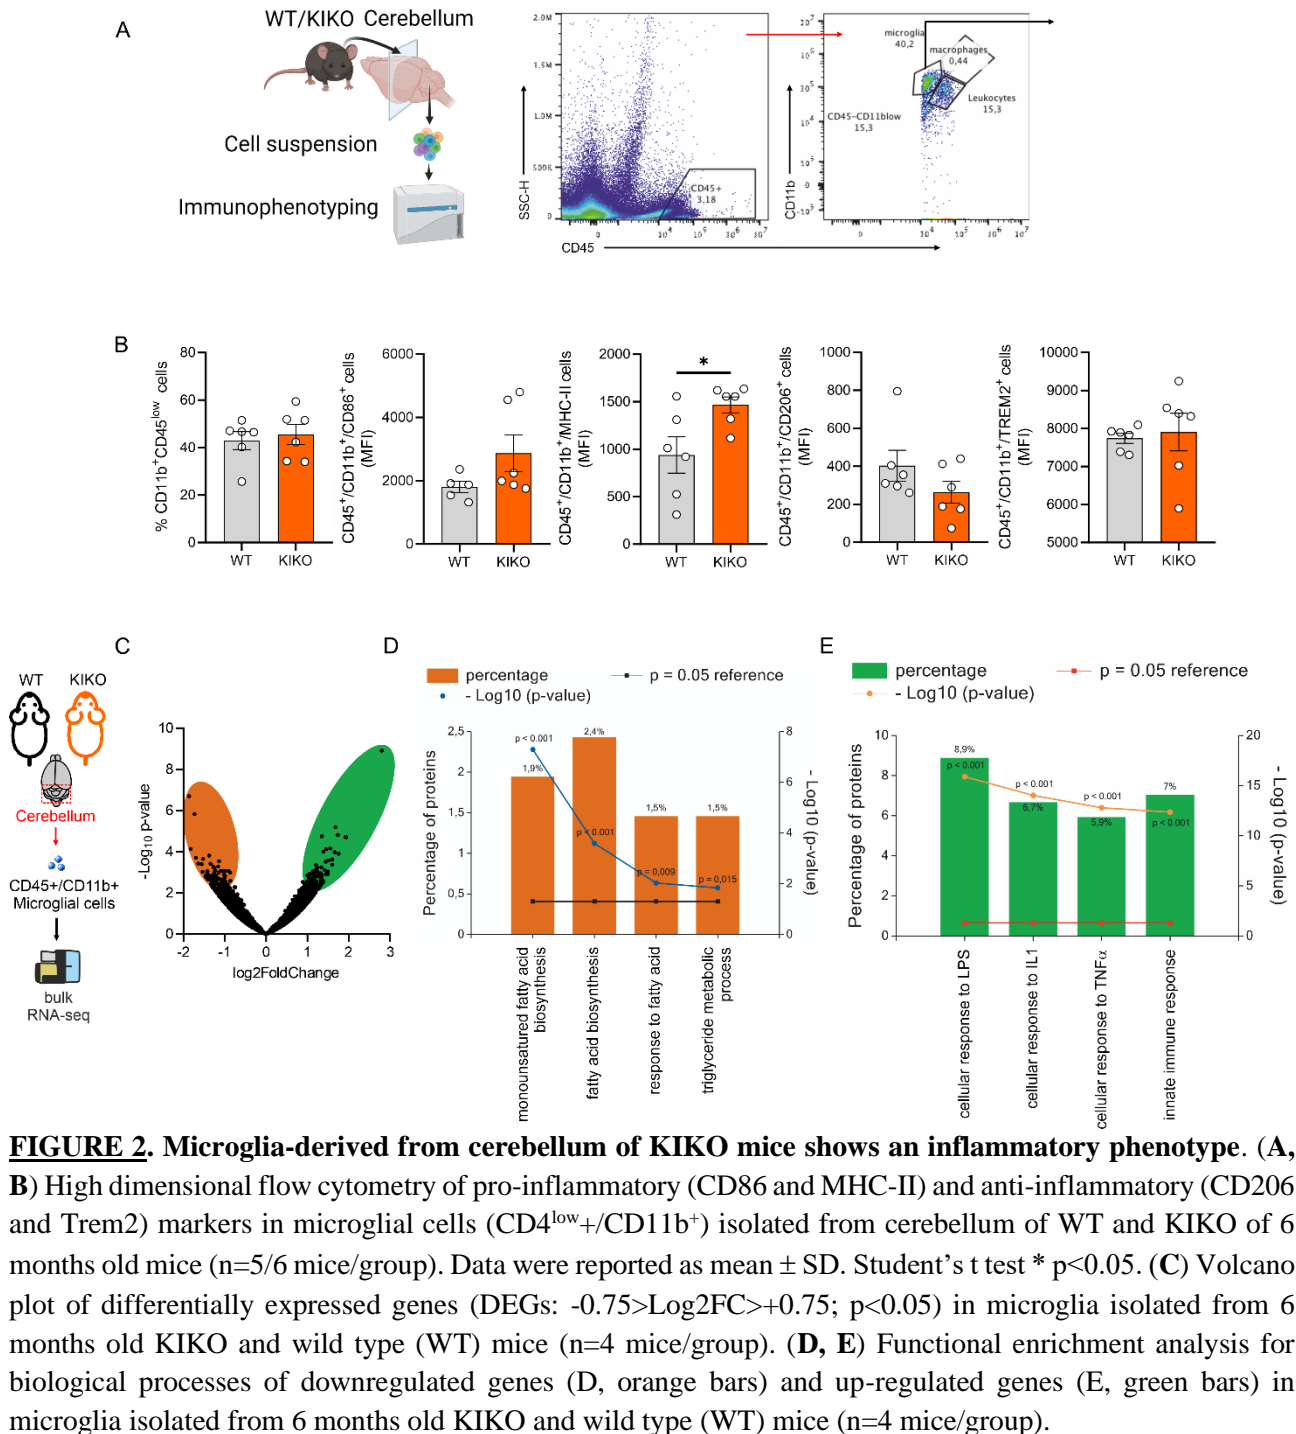

546  
 547  
 548  
 549  
 550  
 551  
 552  
 553  
 554

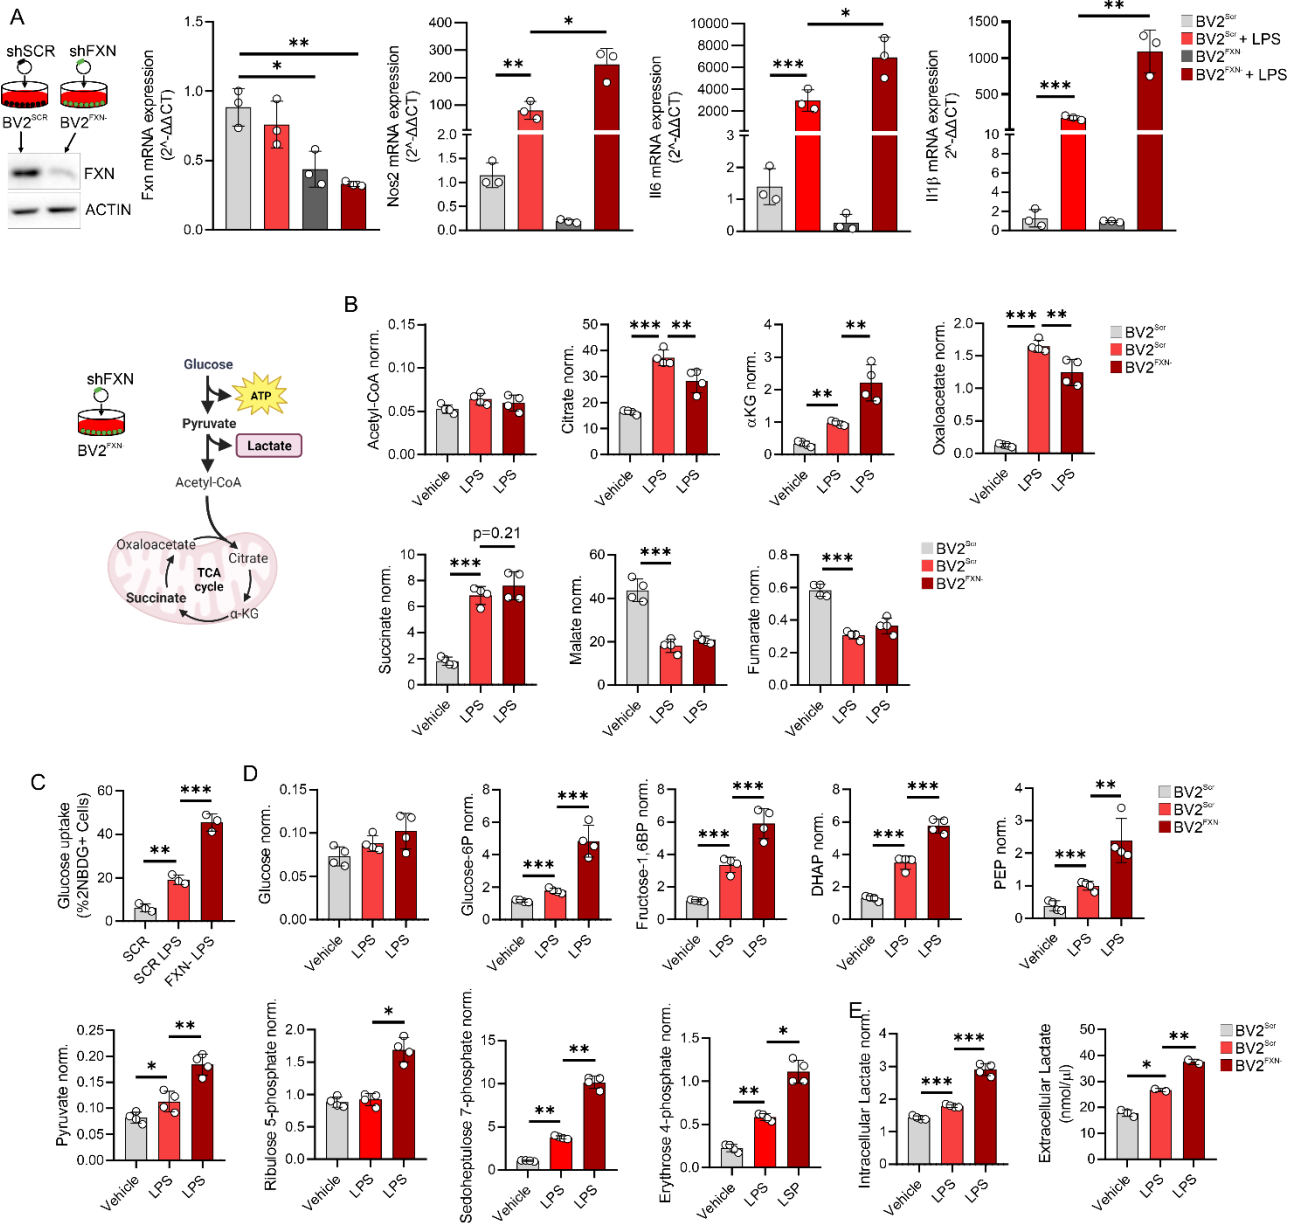

555  
 556 **FIGURE 3. Loss of frataxin forces glucose catabolism in microglial cells.** (A) BV2 cells were transfected  
 557 with lentiviral particles delivering Fxn or Scr sequence and gene expression level of inflammatory genes  
 558 (Nos2, Il6, Il1β) were analyzed by qPCR. LPS (500 ng/mL for 16 hours) was used to activate BV2 cells. Data  
 559 were reported as mean ± SD. ANOVA test \* p<0.05; \*\* p<0.01; \*\*\* p<0.001. (B) BV2 were cells transfected  
 560 with lentiviral particles delivering Fxn or Scr sequence and metabolites tracking TCA cycle were measured by  
 561 LC-MS. LPS (500 ng/mL for 16 hours) was used to activate BV2 cells. Data were reported as mean ± SD.  
 562 ANOVA test \*\* p<0.01; \*\*\* p<0.001. (C) BV2 cells transfected with lentiviral particles delivering Fxn or Scr  
 563 sequence were loaded 2NBDG for 30 minutes. Glucose uptake calculated as 2-NBDG+ cells by flow  
 564 cytometry. LPS (500 ng/mL for 16 hours) was used to activate BV2 cells. Data were reported as mean ± SD.  
 565 ANOVA test \*\* p<0.01; \*\*\* p<0.001. (D) BV2 were cells transfected with lentiviral particles delivering Fxn  
 566 or Scr sequence and metabolites tracking glycolysis and pentose phosphate pathway were measured by LC-  
 567 MS. LPS (500 ng/mL for 16 hours) was used to activate BV2 cells. Data were reported as mean ± SD. ANOVA  
 568 test \* p<0.05; \*\* p<0.01; \*\*\* p<0.001. (E) BV2 were cells transfected with lentiviral particles delivering Fxn  
 569 or Scr sequence and lactate production was measured by LC-MS (intracellular) or spectrophotometer

570 (extracellular). LPS (500 ng/mL for 16 hours) was used to activate BV2 cells. Data were reported as mean  $\pm$   
 571 SD. ANOVA test \*  $p < 0.05$ ; \*\*  $p < 0.01$ ; \*\*\*  $p < 0.001$ .  
 572  
 573

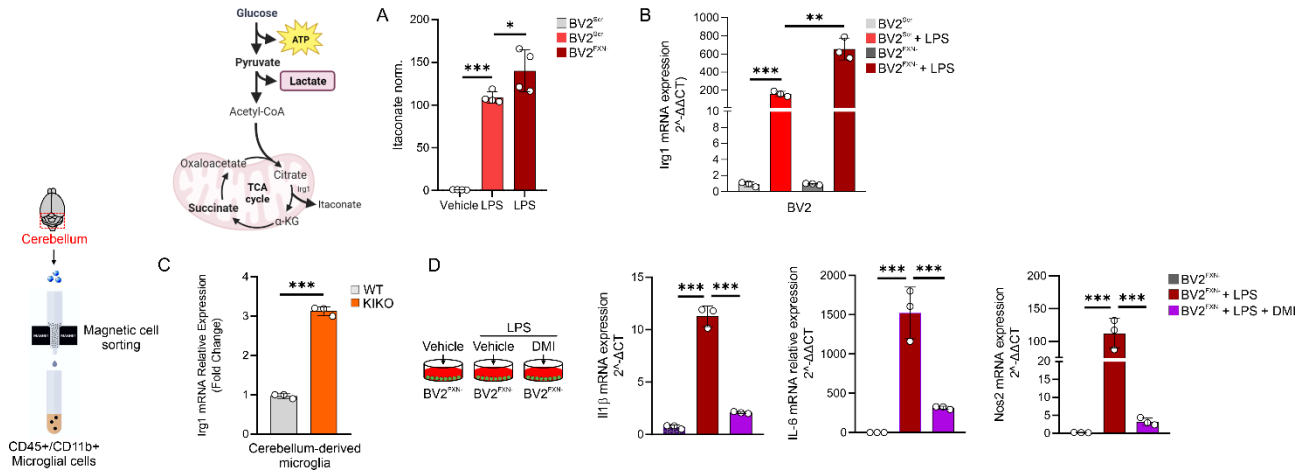

574  
 575  
 576 **FIGURE 4. Itaconate overproduction restrains the inflammatory phenotype in FRDA microglial cells.**  
 577 (A, B) BV2 cells were transfected with lentiviral particles delivering Fxn or Scr sequence and itaconate  
 578 production (A) and Irg1 mRNA expression (B) were analyzed by LC-MS and qPCR, respectively. LPS (500  
 579 ng/mL for 16 hours) was used to activate BV2 cells. Data were reported as mean  $\pm$  SD. ANOVA test \*  $p < 0.05$ ;  
 580 \*\*  $p < 0.01$ ; \*\*\*  $p < 0.001$ . (C) Microglial cells were isolated from cerebellum of 6 months old KIKO or WT  
 581 mice by magnetic cell sorting (CD45<sup>+</sup>/CD11b<sup>+</sup> cells) and Irg1 mRNA expression was analyzed by qPCR. Data  
 582 were reported as mean  $\pm$  SD. Student's t test \*\*\*  $p < 0.001$ . (D) BV2 cells were transfected with lentiviral  
 583 particles delivering Fxn sequence and the inflammatory gene expression was analyzed by qPCR. LPS (500  
 584 ng/mL for 16 hours) was used to activate BV2 cells. Dimethyl itaconate (DMI, 100M) was added 3 hours  
 585 before LPS treatment and maintained throughout the experiment. Data were reported as mean  $\pm$  SD. ANOVA  
 586 test \*\*\*  $p < 0.001$ ).



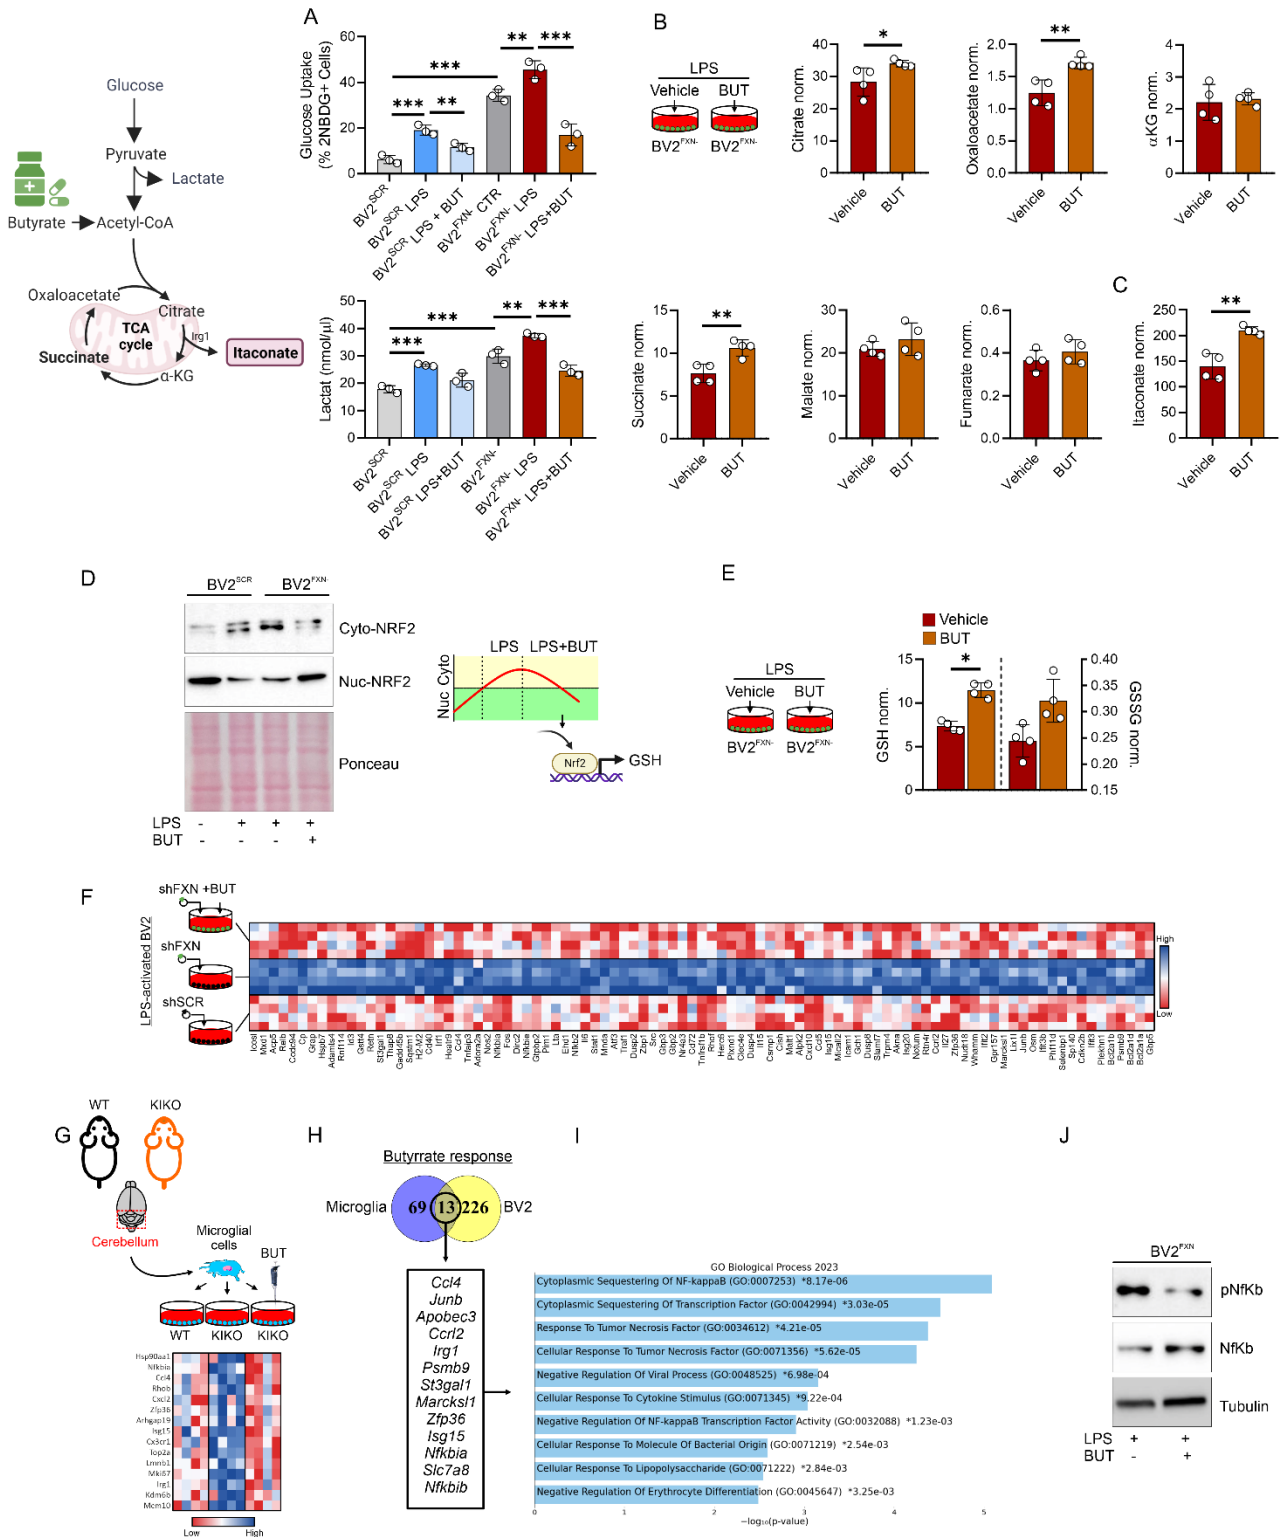

587  
588

589 **FIGURE 5. Butyrate rewires the immunometabolism of microglia downregulating FXN.** (A) BV2 cells  
590 were transfected with lentiviral particles delivering Fxn or Scr sequence and glucose uptake (upper panel) and  
591 lactate production (bottom panel) were measured by flow cytometry and spectrofluorometer, respectively. LPS  
592 (500 ng/mL for 16 hours) was used to activate BV2 cells. Sodium butyrate (BUT, 500 $\mu$ M) was added 3 hours  
593 before LPS treatment and maintained throughout the experiment. Data were reported as mean  $\pm$  SD. ANOVA  
594 test \*\* $p$ <0.01; \*\*\*  $p$ <0.001. (B, C) BV2 cells were transfected with lentiviral particles delivering Fxn sequence  
595 and metabolites tracking TCA cycle (B) and itaconate (C) were measured by LC-MS. LPS (500 ng/mL for 16  
596 hours) was used to activate BV2 cells. Sodium butyrate (BUT, 500 $\mu$ M) was added 3 hours before LPS

597 treatment and maintained throughout the experiment. Data were reported as mean  $\pm$  SD. Student's t test \*  
 598  $p < 0.05$ ; \*\* $p < 0.01$ ). (D) BV2 cells were transfected with lentiviral particles delivering Fxn or Scr sequence and  
 599 cytosolic/nuclear fractions of NRF2 were analyzed by western blot. LPS (500 ng/mL for 16 hours) was used  
 600 to activate BV2 cells. Sodium butyrate (BUT, 500 $\mu$ M) was added 3 hours before LPS treatment and maintained  
 601 throughout the experiment. Ponceau staining was used as loading control. (E) BV2 cells were transfected with  
 602 lentiviral particles delivering Fxn sequence and GSH and GSSG levels were measured by LC-MS. LPS (500  
 603 ng/mL for 16 hours) was used to activate BV2 cells. Sodium butyrate (BUT, 500 $\mu$ M) was added 3 hours before  
 604 LPS treatment and maintained throughout the experiment. Data were reported as mean  $\pm$  SD. Student's t test  
 605 \*  $p < 0.05$ . (F) Heatmap of differentially expressed genes ( $p < 0.05$ ) in BV2 cells transfected with lentiviral  
 606 particles delivering Fxn or scramble (Scr) sequence. LPS (500 ng/mL for 16 hours) was used to activate BV2  
 607 cells. Sodium butyrate (BUT, 500 $\mu$ M) was added 3 hours before LPS treatment and maintained throughout the  
 608 experiment. (G) Heatmap of differentially expressed genes ( $p < 0.05$ ) in microglia isolated from the cerebellum  
 609 of WT and KIKO mice. Sodium butyrate (BUT, 500 $\mu$ M) was added to the culture medium for 16 hours. (H,  
 610 I) Venn diagram of butyrate-responsive genes in LPS-stimulated BV2 and microglia isolated from KIKO mice  
 611 (H) and the functional enrichment analysis of the overlapping genes was analyzed by EnrichR (I). (J) BV2  
 612 cells were transfected with lentiviral particles delivering Fxn sequence and pospho-active and basal form of  
 613 NfKb were analyzed by western blot. Tubulin was used as loading control. LPS (500 ng/mL for 16 hours) was  
 614 used to activate BV2 cells. Sodium butyrate (BUT, 500 $\mu$ M) was added 3 hours before LPS treatment and  
 615 maintained throughout the experiment.  
 616  
 617  
 618

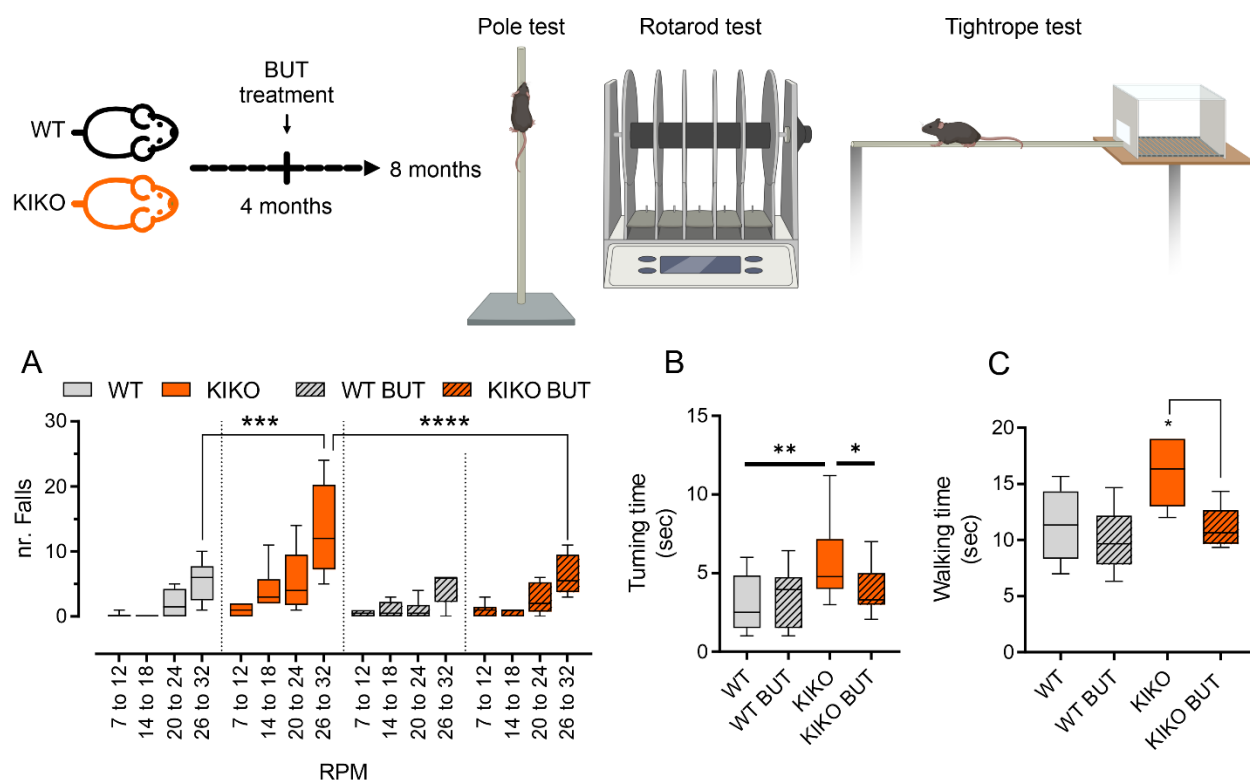

619  
 620  
 621 **FIGURE 6. Butyrate supplementation enhances neuromotor performance in KIKO mice.** Male WT and  
 622 KIKO mice, aged four months, were either maintained on a standard diet or one supplemented with butyrate  
 623 (BUT) for a duration of 16 weeks, until they reached eight months of age. A) Rotarod test performance,  
 624 expressed by the number of falls, across various speeds. B) Duration taken for the mice to turn during pole test

625 atop the pole. C) Time of walking during the tightrope test. Data are presented as mean  $\pm$  SD. ANOVA \*  
 626  $p < 0.05$ , \*\*  $p < 0.01$ , \*\*\*  $p < 0.001$ , \*\*\*\*  $p < 0.0001$  (n=6 mice/group).  
 627

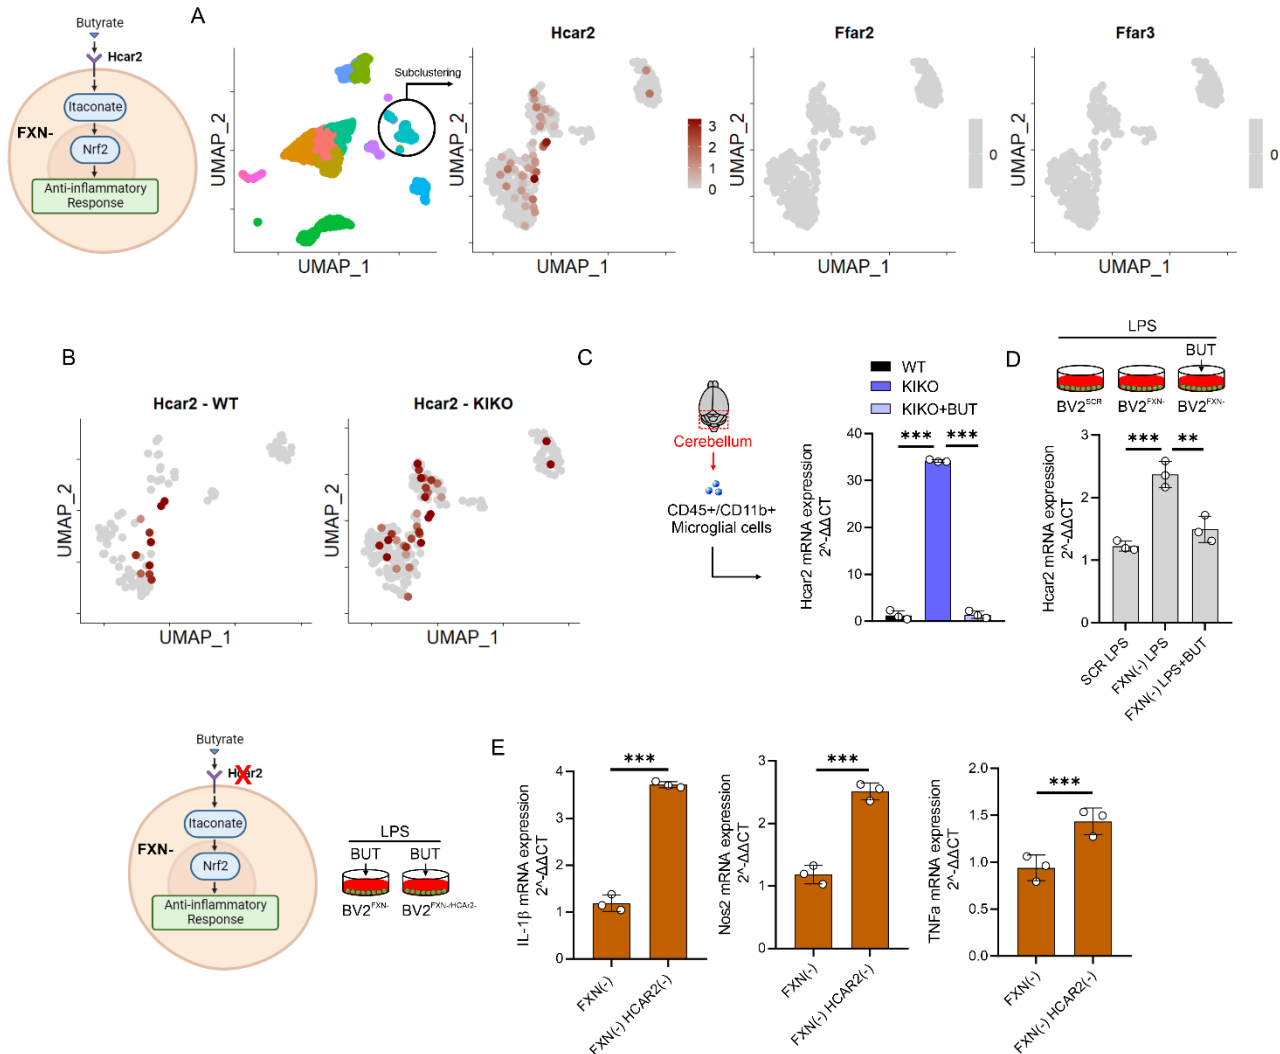

628  
 629 **FIGURE 7. Hcar2 mediates the butyrate responses in the FRDA microglia.** (A) Cerebellar microglial cells  
 630 analyzed by scRNA-seq were subclustered and Hcar2, Ffar2 and Ffar3 expression levels were analyzed (pool  
 631 of n=4 mice/group). (B) Hcar2 expression levels in cerebellar microglia of 6 months-old WT and KIKO mice  
 632 (pool of n=4 mice/group). (C) Microglia were isolate from cerebellum of WT, KIKO or KIKO mice fed  
 633 butyrate and Hcar2 expression level was measured by qPCR (n=3 mice/group). Data were reported as mean  $\pm$   
 634 SD. ANOVA test \*\*\* $p < 0.001$ ). (D) BV2 cells were transfected with lentiviral particles delivering scramble  
 635 (Scr) or Fxn sequence and Hcar2 expression levels and Hcar2 expression level was measured by qPCR. Data  
 636 were reported as mean  $\pm$  SD. ANOVA test \*\* $p < 0.01$ ; \*\*\* $p < 0.001$ .  
 637  
 638

## 639 REFERENCES

640 Abdel-Haq, R., Schlachetzki, J.C.M., Glass, C.K., and Mazmanian, S.K. (2019). Microbiome-microglia  
 641 connections via the gut-brain axis. *J Exp Med* 216, 41-59. 10.1084/jem.20180794.  
 642 Al-Mahdawi, S., Pinto, R.M., Varshney, D., Lawrence, L., Lowrie, M.B., Hughes, S., Webster, Z., Blake,  
 643 J., Cooper, J.M., King, R., and Pook, M.A. (2006). GAA repeat expansion mutation mouse models of  
 644 Friedreich ataxia exhibit oxidative stress leading to progressive neuronal and cardiac pathology.  
 645 *Genomics* 88, 580-590. 10.1016/j.ygeno.2006.06.015.

- 646 Anzovino, A., Lane, D.J., Huang, M.L., and Richardson, D.R. (2014). Fixing frataxin: 'ironing out' the  
647 metabolic defect in Friedreich's ataxia. *Br J Pharmacol* *171*, 2174-2190. 10.1111/bph.12470.
- 648 Apolloni, S., Milani, M., and D'Ambrosi, N. (2022). Neuroinflammation in Friedreich's Ataxia. *Int J*  
649 *Mol Sci* *23*. 10.3390/ijms23116297.
- 650 Apolloni, S., Parisi, C., Pesaresi, M.G., Rossi, S., Carri, M.T., Cozzolino, M., Volonte, C., and D'Ambrosi,  
651 N. (2013). The NADPH oxidase pathway is dysregulated by the P2X7 receptor in the SOD1-G93A  
652 microglia model of amyotrophic lateral sclerosis. *J Immunol* *190*, 5187-5195.  
653 10.4049/jimmunol.1203262.
- 654 Aran, D., Looney, A.P., Liu, L., Wu, E., Fong, V., Hsu, A., Chak, S., Naikawadi, R.P., Wolters, P.J., Abate,  
655 A.R., et al. (2019). Reference-based analysis of lung single-cell sequencing reveals a transitional  
656 profibrotic macrophage. *Nat Immunol* *20*, 163-172. 10.1038/s41590-018-0276-y.
- 657 Bachem, A., Makhlof, C., Binger, K.J., de Souza, D.P., Tull, D., Hochheiser, K., Whitney, P.G.,  
658 Fernandez-Ruiz, D., Dahling, S., Kastenmuller, W., et al. (2019). Microbiota-Derived Short-Chain  
659 Fatty Acids Promote the Memory Potential of Antigen-Activated CD8(+) T Cells. *Immunity* *51*, 285-  
660 297 e285. 10.1016/j.immuni.2019.06.002.
- 661 Bernier, L.P., York, E.M., and MacVicar, B.A. (2020). Immunometabolism in the Brain: How  
662 Metabolism Shapes Microglial Function. *Trends Neurosci* *43*, 854-869. 10.1016/j.tins.2020.08.008.
- 663 Bohlen, M., Cameron, A., Metten, P., Crabbe, J.C., and Wahlsten, D. (2009). Calibration of rotational  
664 acceleration for the rotarod test of rodent motor coordination. *J Neurosci Methods* *178*, 10-14.  
665 10.1016/j.jneumeth.2008.11.001.
- 666 Bolger, A.M., Lohse, M., and Usadel, B. (2014). Trimmomatic: a flexible trimmer for Illumina  
667 sequence data. *Bioinformatics* *30*, 2114-2120. 10.1093/bioinformatics/btu170.
- 668 Caetano-Silva, M.E., Rund, L., Hutchinson, N.T., Woods, J.A., Steelman, A.J., and Johnson, R.W.  
669 (2023). Inhibition of inflammatory microglia by dietary fiber and short-chain fatty acids. *Sci Rep* *13*,  
670 2819. 10.1038/s41598-022-27086-x.
- 671 Carretta, M.D., Quiroga, J., Lopez, R., Hidalgo, M.A., and Burgos, R.A. (2021). Participation of Short-  
672 Chain Fatty Acids and Their Receptors in Gut Inflammation and Colon Cancer. *Front Physiol* *12*,  
673 662739. 10.3389/fphys.2021.662739.
- 674 Chriett, S., Dabek, A., Wojtala, M., Vidal, H., Balcerczyk, A., and Pirola, L. (2019). Prominent action  
675 of butyrate over beta-hydroxybutyrate as histone deacetylase inhibitor, transcriptional modulator  
676 and anti-inflammatory molecule. *Sci Rep* *9*, 742. 10.1038/s41598-018-36941-9.
- 677 Clark, E., Johnson, J., Dong, Y.N., Mercado-Ayon, E., Warren, N., Zhai, M., McMillan, E., Salovin, A.,  
678 Lin, H., and Lynch, D.R. (2018). Role of frataxin protein deficiency and metabolic dysfunction in  
679 Friedreich ataxia, an autosomal recessive mitochondrial disease. *Neuronal Signal* *2*, NS20180060.  
680 10.1042/NS20180060.
- 681 Deleu, S., Machiels, K., Raes, J., Verbeke, K., and Vermeire, S. (2021). Short chain fatty acids and its  
682 producing organisms: An overlooked therapy for IBD? *EBioMedicine* *66*, 103293.  
683 10.1016/j.ebiom.2021.103293.
- 684 Dong, Y.N., Mesaros, C., Xu, P., Mercado-Ayon, E., Halawani, S., Ngaba, L.V., Warren, N., Sleiman, P.,  
685 Rodden, L.N., Schadt, K.A., et al. (2022). Frataxin controls ketone body metabolism through  
686 regulation of OXCT1. *PNAS Nexus* *1*, pgac142. 10.1093/pnasnexus/pgac142.
- 687 Flemming, A. (2019). Butyrate boosts microbicidal macrophages. *Nat Rev Immunol* *19*, 135.  
688 10.1038/s41577-019-0132-9.
- 689 Ge, X., Zheng, M., Hu, M., Fang, X., Geng, D., Liu, S., Wang, L., Zhang, J., Guan, L., Zheng, P., et al.  
690 (2023). Butyrate ameliorates quinolinic acid-induced cognitive decline in obesity models. *J Clin*  
691 *Invest* *133*. 10.1172/JCI154612.

- 692 Guo, T.T., Zhang, Z., Sun, Y., Zhu, R.Y., Wang, F.X., Ma, L.J., Jiang, L., and Liu, H.D. (2023).  
693 Neuroprotective Effects of Sodium Butyrate by Restoring Gut Microbiota and Inhibiting TLR4  
694 Signaling in Mice with MPTP-Induced Parkinson's Disease. *Nutrients* 15. 10.3390/nu15040930.
- 695 Guo, W., Liu, J., Sun, J., Gong, Q., Ma, H., Kan, X., Cao, Y., Wang, J., and Fu, S. (2020). Butyrate  
696 alleviates oxidative stress by regulating NRF2 nuclear accumulation and H3K9/14 acetylation via  
697 GPR109A in bovine mammary epithelial cells and mammary glands. *Free Radic Biol Med* 152, 728-  
698 742. 10.1016/j.freeradbiomed.2020.01.016.
- 699 Harvey, C.J., Thimmulappa, R.K., Singh, A., Blake, D.J., Ling, G., Wakabayashi, N., Fujii, J., Myers, A.,  
700 and Biswal, S. (2009). Nrf2-regulated glutathione recycling independent of biosynthesis is critical for  
701 cell survival during oxidative stress. *Free Radic Biol Med* 46, 443-453.  
702 10.1016/j.freeradbiomed.2008.10.040.
- 703 Hayashi, G., Shen, Y., Pedersen, T.L., Newman, J.W., Pook, M., and Cortopassi, G. (2014). Frataxin  
704 deficiency increases cyclooxygenase 2 and prostaglandins in cell and animal models of Friedreich's  
705 ataxia. *Hum Mol Genet* 23, 6838-6847. 10.1093/hmg/ddu407.
- 706 He, D., Fu, S., Ye, B., Wang, H., He, Y., Li, Z., Li, J., Gao, X., and Liu, D. (2023). Activation of HCA2  
707 regulates microglial responses to alleviate neurodegeneration in LPS-induced in vivo and in vitro  
708 models. *J Neuroinflammation* 20, 86. 10.1186/s12974-023-02762-5.
- 709 Huuskonen, J., Suuronen, T., Nuutinen, T., Kyrylenko, S., and Salminen, A. (2004). Regulation of  
710 microglial inflammatory response by sodium butyrate and short-chain fatty acids. *Br J Pharmacol*  
711 141, 874-880. 10.1038/sj.bjp.0705682.
- 712 Jha, A.K., Huang, S.C., Sergushichev, A., Lampropoulou, V., Ivanova, Y., Loginicheva, E., Chmielewski,  
713 K., Stewart, K.M., Ashall, J., Everts, B., et al. (2015). Network integration of parallel metabolic and  
714 transcriptional data reveals metabolic modules that regulate macrophage polarization. *Immunity*  
715 42, 419-430. 10.1016/j.immuni.2015.02.005.
- 716 Jiang, Y., Li, K., Li, X., Xu, L., and Yang, Z. (2021). Sodium butyrate ameliorates the impairment of  
717 synaptic plasticity by inhibiting the neuroinflammation in 5XFAD mice. *Chem Biol Interact* 341,  
718 109452. 10.1016/j.cbi.2021.109452.
- 719 Khan, W., Corben, L.A., Bilal, H., Vivash, L., Delatycki, M.B., Egan, G.F., and Harding, I.H. (2022).  
720 Neuroinflammation in the Cerebellum and Brainstem in Friedreich Ataxia: An [18F]-FEMPA PET  
721 Study. *Mov Disord* 37, 218-224. 10.1002/mds.28825.
- 722 Kim, D., Paggi, J.M., Park, C., Bennett, C., and Salzberg, S.L. (2019). Graph-based genome alignment  
723 and genotyping with HISAT2 and HISAT-genotype. *Nat Biotechnol* 37, 907-915. 10.1038/s41587-  
724 019-0201-4.
- 725 La Rosa, P., Petrillo, S., Turchi, R., Berardinelli, F., Schirinzi, T., Vasco, G., Lettieri-Barbato, D.,  
726 Fiorenza, M.T., Bertini, E.S., Aquilano, K., and Piemonte, F. (2021). The Nrf2 induction prevents  
727 ferroptosis in Friedreich's Ataxia. *Redox Biol* 38, 101791. 10.1016/j.redox.2020.101791.
- 728 Lampropoulou, V., Sergushichev, A., Bambouskova, M., Nair, S., Vincent, E.E., Loginicheva, E.,  
729 Cervantes-Barragan, L., Ma, X., Huang, S.C., Griss, T., et al. (2016). Itaconate Links Inhibition of  
730 Succinate Dehydrogenase with Macrophage Metabolic Remodeling and Regulation of Inflammation.  
731 *Cell Metab* 24, 158-166. 10.1016/j.cmet.2016.06.004.
- 732 Lanza, M., Campolo, M., Casili, G., Filippone, A., Paterniti, I., Cuzzocrea, S., and Esposito, E. (2019).  
733 Sodium Butyrate Exerts Neuroprotective Effects in Spinal Cord Injury. *Mol Neurobiol* 56, 3937-3947.  
734 10.1007/s12035-018-1347-7.
- 735 Li, H., Sun, J., Wang, F., Ding, G., Chen, W., Fang, R., Yao, Y., Pang, M., Lu, Z.Q., and Liu, J. (2016).  
736 Sodium butyrate exerts neuroprotective effects by restoring the blood-brain barrier in traumatic  
737 brain injury mice. *Brain Res* 1642, 70-78. 10.1016/j.brainres.2016.03.031.

- 738 Liao, Y., Smyth, G.K., and Shi, W. (2014). featureCounts: an efficient general purpose program for  
739 assigning sequence reads to genomic features. *Bioinformatics* 30, 923-930.  
740 10.1093/bioinformatics/btt656.
- 741 Love, M.I., Huber, W., and Anders, S. (2014). Moderated estimation of fold change and dispersion  
742 for RNA-seq data with DESeq2. *Genome Biol* 15, 550. 10.1186/s13059-014-0550-8.
- 743 Mills, E.L., Ryan, D.G., Prag, H.A., Dikovskaya, D., Menon, D., Zaslona, Z., Jedrychowski, M.P., Costa,  
744 A.S.H., Higgins, M., Hams, E., et al. (2018). Itaconate is an anti-inflammatory metabolite that  
745 activates Nrf2 via alkylation of KEAP1. *Nature* 556, 113-117. 10.1038/nature25986.
- 746 Miquel, J., and Blasco, M. (1978). A simple technique for evaluation of vitality loss in aging mice, by  
747 testing their muscular coordination and vigor. *Exp Gerontol* 13, 389-396. 10.1016/0531-  
748 5565(78)90049-9.
- 749 Mou, Y., Du, Y., Zhou, L., Yue, J., Hu, X., Liu, Y., Chen, S., Lin, X., Zhang, G., Xiao, H., and Dong, B.  
750 (2022). Gut Microbiota Interact With the Brain Through Systemic Chronic Inflammation:  
751 Implications on Neuroinflammation, Neurodegeneration, and Aging. *Front Immunol* 13, 796288.  
752 10.3389/fimmu.2022.796288.
- 753 Moutinho, M., Puntambekar, S.S., Tsai, A.P., Coronel, I., Lin, P.B., Casali, B.T., Martinez, P., Oblak,  
754 A.L., Lasagna-Reeves, C.A., Lamb, B.T., and Landreth, G.E. (2022). The niacin receptor HCAR2  
755 modulates microglial response and limits disease progression in a mouse model of Alzheimer's  
756 disease. *Sci Transl Med* 14, eabl7634. 10.1126/scitranslmed.abl7634.
- 757 Nachun, D., Gao, F., Isaacs, C., Strawser, C., Yang, Z., Dokuru, D., Van Berlo, V., Sears, R., Farmer, J.,  
758 Perlman, S., et al. (2018). Peripheral blood gene expression reveals an inflammatory transcriptomic  
759 signature in Friedreich's ataxia patients. *Hum Mol Genet* 27, 2965-2977. 10.1093/hmg/ddy198.
- 760 Norris, G.T., and Kipnis, J. (2019). Immune cells and CNS physiology: Microglia and beyond. *J Exp*  
761 *Med* 216, 60-70. 10.1084/jem.20180199.
- 762 O'Neill, L.A., Kishton, R.J., and Rathmell, J. (2016). A guide to immunometabolism for immunologists.  
763 *Nat Rev Immunol* 16, 553-565. 10.1038/nri.2016.70.
- 764 Offermanns, S. (2014). Free fatty acid (FFA) and hydroxy carboxylic acid (HCA) receptors. *Annu Rev*  
765 *Pharmacol Toxicol* 54, 407-434. 10.1146/annurev-pharmtox-011613-135945.
- 766 Pan, W., Zhao, J., Wu, J., Xu, D., Meng, X., Jiang, P., Shi, H., Ge, X., Yang, X., Hu, M., et al. (2023).  
767 Dimethyl itaconate ameliorates cognitive impairment induced by a high-fat diet via the gut-brain  
768 axis in mice. *Microbiome* 11, 30. 10.1186/s40168-023-01471-8.
- 769 Parada Venegas, D., De la Fuente, M.K., Landskron, G., Gonzalez, M.J., Quera, R., Dijkstra, G.,  
770 Harmsen, H.J.M., Faber, K.N., and Hermoso, M.A. (2019). Short Chain Fatty Acids (SCFAs)-Mediated  
771 Gut Epithelial and Immune Regulation and Its Relevance for Inflammatory Bowel Diseases. *Front*  
772 *Immunol* 10, 277. 10.3389/fimmu.2019.00277.
- 773 Peace, C.G., and O'Neill, L.A. (2022). The role of itaconate in host defense and inflammation. *J Clin*  
774 *Invest* 132. 10.1172/JCI148548.
- 775 Que, R., Zheng, J., Chang, Z., Zhang, W., Li, H., Xie, Z., Huang, Z., Wang, H.T., Xu, J., Jin, D., et al.  
776 (2021). DI-3-n-Butylphthalide Rescues Dopaminergic Neurons in Parkinson's Disease Models by  
777 Inhibiting the NLRP3 Inflammasome and Ameliorating Mitochondrial Impairment. *Front Immunol*  
778 12, 794770. 10.3389/fimmu.2021.794770.
- 779 Richards, E.M., Li, J., Stevens, B.R., Pepine, C.J., and Raizada, M.K. (2022). Gut Microbiome and  
780 Neuroinflammation in Hypertension. *Circ Res* 130, 401-417. 10.1161/CIRCRESAHA.121.319816.
- 781 Sampson, T.R., Debelius, J.W., Thron, T., Janssen, S., Shastri, G.G., Ilhan, Z.E., Challis, C., Schretter,  
782 C.E., Rocha, S., Gradinaru, V., et al. (2016). Gut Microbiota Regulate Motor Deficits and  
783 Neuroinflammation in a Model of Parkinson's Disease. *Cell* 167, 1469-1480 e1412.  
784 10.1016/j.cell.2016.11.018.

785 Sangineto, M., Ciarnelli, M., Cassano, T., Radesco, A., Moola, A., Bukke, V.N., Romano, A., Villani, R.,  
786 Kanwal, H., Capitanio, N., et al. (2023). Metabolic reprogramming in inflammatory microglia  
787 indicates a potential way of targeting inflammation in Alzheimer's disease. *Redox Biol* *66*, 102846.  
788 [10.1016/j.redox.2023.102846](https://doi.org/10.1016/j.redox.2023.102846).

789 Satija, R., Farrell, J.A., Gennert, D., Schier, A.F., and Regev, A. (2015). Spatial reconstruction of single-  
790 cell gene expression data. *Nat Biotechnol* *33*, 495-502. [10.1038/nbt.3192](https://doi.org/10.1038/nbt.3192).

791 Schulthess, J., Pandey, S., Capitani, M., Rue-Albrecht, K.C., Arnold, I., Franchini, F., Chomka, A., Ilott,  
792 N.E., Johnston, D.G.W., Pires, E., et al. (2019). The Short Chain Fatty Acid Butyrate Imprints an  
793 Antimicrobial Program in Macrophages. *Immunity* *50*, 432-445 e437.  
794 [10.1016/j.immuni.2018.12.018](https://doi.org/10.1016/j.immuni.2018.12.018).

795 Sciarretta, F., Ceci, V., Tiberi, M., Zaccaria, F., Li, H., Zhou, Z.Y., Sun, Q., Konja, D., Matteocci, A.,  
796 Bhusal, A., et al. (2023). Lipocalin-2 promotes adipose-macrophage interactions to shape peripheral  
797 and central inflammatory responses in experimental autoimmune encephalomyelitis. *Mol Metab*  
798 *76*, 101783. [10.1016/j.molmet.2023.101783](https://doi.org/10.1016/j.molmet.2023.101783).

799 Shen, Y., McMackin, M.Z., Shan, Y., Raetz, A., David, S., and Cortopassi, G. (2016). Frataxin Deficiency  
800 Promotes Excess Microglial DNA Damage and Inflammation that Is Rescued by PJ34. *PLoS One* *11*,  
801 e0151026. [10.1371/journal.pone.0151026](https://doi.org/10.1371/journal.pone.0151026).

802 Soto-Herederó, G., Gomez de Las Heras, M.M., Gabande-Rodríguez, E., Oller, J., and Mittelbrunn,  
803 M. (2020). Glycolysis - a key player in the inflammatory response. *FEBS J* *287*, 3350-3369.  
804 [10.1111/febs.15327](https://doi.org/10.1111/febs.15327).

805 Turchi, R., Sciarretta, F., Ceci, V., Tiberi, M., Audano, M., Pedretti, S., Panebianco, C., Nesci, V.,  
806 Pazienza, V., Ferri, A., et al. (2023). Butyrate prevents visceral adipose tissue inflammation and  
807 metabolic alterations in a Friedreich's ataxia mouse model. *iScience* *26*, 107713.  
808 [10.1016/j.isci.2023.107713](https://doi.org/10.1016/j.isci.2023.107713).

809 Wei, H., Yu, C., Zhang, C., Ren, Y., Guo, L., Wang, T., Chen, F., Li, Y., Zhang, X., Wang, H., and Liu, J.  
810 (2023). Butyrate ameliorates chronic alcoholic central nervous damage by suppressing microglia-  
811 mediated neuroinflammation and modulating the microbiome-gut-brain axis. *Biomed*  
812 *Pharmacother* *160*, 114308. [10.1016/j.biopha.2023.114308](https://doi.org/10.1016/j.biopha.2023.114308).

813 Wenzel, T.J., Gates, E.J., Ranger, A.L., and Klegeris, A. (2020). Short-chain fatty acids (SCFAs) alone  
814 or in combination regulate select immune functions of microglia-like cells. *Mol Cell Neurosci* *105*,  
815 103493. [10.1016/j.mcn.2020.103493](https://doi.org/10.1016/j.mcn.2020.103493).

816
